# Supplementary material
Source: PubMed Central journal article supplement (PMC10257374)
Supplement: 11427_2023_2378_MOESM2_ESM.pdf [file 11427_2023_2378_MOESM2_ESM.pdf]

**Table S2 ELISA analyses of binding of immunized sera on captured MPV antigens.**

| <b>Vac-Ctrl(A35R)</b> |          |          |          |
|-----------------------|----------|----------|----------|
| Time                  | Dilution | OD450    | SD       |
| DAY7                  | 100      | 0.047608 | 0.032055 |
| DAY14                 | 100      | 0.056757 | 0.013189 |
| DAY28                 | 100      | 0.043107 | 0.013724 |
| DAY43                 | 100      | 0.054778 | 0.01294  |
| DAY57                 | 100      | 0.051133 | 0.021774 |

| <b>Vac-Ctrl(B6R)</b> |          |          |          |
|----------------------|----------|----------|----------|
| Time                 | Dilution | OD450    | SD       |
| DAY7                 | 100      | 0.099914 | 0.06506  |
| DAY14                | 100      | 0.119216 | 0.022005 |
| DAY28                | 100      | 0.071688 | 0.038385 |
| DAY43                | 100      | 0.070688 | 0.02759  |
| DAY57                | 100      | 0.041772 | 0.007423 |

| <b>Vac-Ctrl(H3L)</b> |          |          |          |
|----------------------|----------|----------|----------|
| Time                 | Dilution | OD450    | SD       |
| DAY7                 | 100      | 0.044282 | 0.03859  |
| DAY14                | 100      | 0.067876 | 0.026044 |
| DAY28                | 100      | 0.094553 | 0.055035 |
| DAY43                | 100      | 0.086684 | 0.039631 |
| DAY57                | 100      | 0.080983 | 0.044589 |

| <b>Vac-Ctrl(M1R)</b> |          |          |          |
|----------------------|----------|----------|----------|
| Time                 | Dilution | OD450    | SD       |
| DAY7                 | 100      | 0.13134  | 0.124993 |
| DAY14                | 100      | 0.10026  | 0.12595  |
| DAY28                | 100      | 0.097442 | 0.063874 |
| DAY43                | 100      | 0.122274 | 0.066369 |
| DAY57                | 100      | 0.100967 | 0.027295 |

| <b>Vac-Ctrl(E8L)</b> |          |          |          |
|----------------------|----------|----------|----------|
| Time                 | Dilution | OD450    | SD       |
| DAY7                 | 100      | 0.123695 | 0.096059 |
| DAY14                | 100      | 0.120203 | 0.156613 |
| DAY28                | 100      | 0.136844 | 0.066034 |
| DAY43                | 100      | 0.153986 | 0.075147 |
| DAY57                | 100      | 0.366908 | 0.107843 |

| <b>Vac-Ctrl(A29L)</b> |          |          |          |
|-----------------------|----------|----------|----------|
| Time                  | Dilution | OD450    | SD       |
| DAY7                  | 100      | 0.094485 | 0.050671 |
| DAY14                 | 100      | 0.066464 | 0.013548 |
| DAY28                 | 100      | 0.148423 | 0.065333 |
| DAY43                 | 100      | 0.166645 | 0.04173  |
| DAY57                 | 100      | 0.14531  | 0.053285 |

\*SD:Standard Deviation

Table S2 ELISA analyses of binding of immunized sera on captured MPV antigens.

|       |          | MPV-E2(A35R) |          |          |          |          |          |          |          |          |          |          |          |          |          |          |          |          |
|-------|----------|--------------|----------|----------|----------|----------|----------|----------|----------|----------|----------|----------|----------|----------|----------|----------|----------|----------|
| Time  | Dilution | 100          | 200      | 500      | 1000     | 1200     | 1500     | 2000     | 4000     | 4500     | 5000     | 5500     | 6000     | 6500     | 7000     | 8000     | 10000    | 12000    |
| DAY7  | OD450    | 2.900123     | 2.233316 | 0.789675 | 0.723172 | 0.88751  | 0.631733 | 0.45954  | 0.228048 | 0.183073 | 0.159871 | 0.127619 | 0.131326 | 0.104632 | 0.098267 | 0.086939 | 0.069528 | 0.062425 |
|       | SD       | 1.750358     | 1.38582  | 0.530913 | 0.492045 | 0.095404 | 0.106959 | 0.083204 | 0.054596 | 0.042952 | 0.045609 | 0.035438 | 0.036007 | 0.030112 | 0.023713 | 0.026277 | 0.018935 | 0.0188   |
| DAY14 | OD450    | 4.467138     | 3.59791  | 2.661261 | 0.3805   | 0.021139 | 0.088384 | 0.110994 | 0.049478 | 0.081173 | 0.03443  | 0.067436 | 0.033794 |          |          |          |          |          |
|       | SD       | 0.350073     | 0.64157  | 0.69078  | 0.16243  | 0.011088 | 0.041678 | 0.056534 | 0.026168 | 0.041564 | 0.01917  | 0.042501 | 0.016696 |          |          |          |          |          |
| DAY28 | OD450    | 2.236362     | 1.555116 | 0.940725 | 0.424969 | 0.405217 | 0.403893 | 0.334616 | 0.250319 | 0.210971 | 0.254356 | 0.199347 | 0.169726 | 0.131576 | 0.154139 | 0.158519 | 0.142121 |          |
|       | SD       | 0.333415     | 0.347693 | 0.248046 | 0.117532 | 0.13445  | 0.143568 | 0.065928 | 0.050757 | 0.039405 | 0.103182 | 0.076008 | 0.072783 | 0.04019  | 0.005978 | 0.016417 | 0.01702  |          |
| DAY43 | OD450    | 1.220414     | 0.718834 | 0.430308 | 0.378143 | 0.358666 | 0.409063 | 0.346423 | 0.310894 | 0.210123 | 0.180136 | 0.149805 | 0.102246 | 0.098896 | 0.092398 | 0.077949 |          |          |
|       | SD       | 0.436551     | 0.273825 | 5.13E-05 | 0.01815  | 0.020553 | 0.15451  | 0.129279 | 0.062212 | 0.045531 | 0.035265 | 0.040762 | 0.021784 | 0.024215 | 0.020952 | 0.015025 |          |          |
| DAY57 | OD450    | 0.461335     | 0.295958 | 0.215408 | 0.184707 | 0.153597 | 0.137949 | 0.124295 | 0.106606 | 0.106633 | 0.058325 | 0.063514 | 0.050892 |          |          |          |          |          |
|       | SD       | 0.266063     | 0.179004 | 0.127219 | 0.114009 | 0.09806  | 0.081026 | 0.067635 | 0.066113 | 0.056594 | 0.033164 | 0.037428 | 0.033643 |          |          |          |          |          |

  

|       |          | MPV-E2(B6R) |          |          |          |          |
|-------|----------|-------------|----------|----------|----------|----------|
| Time  | Dilution | 100         | 200      | 500      | 1000     |          |
| DAY7  | OD450    | 0.251909    | 0.130585 | 0.045817 | 0.027344 |          |
|       | SD       | 0.258795    | 0.153054 | 0.054353 | 0.034697 |          |
| DAY14 | OD450    | 0.263345    | 0.129901 | 0.135618 | 0.109466 | 0.065728 |
|       | SD       | 0.291608    | 0.119461 | 0.147409 | 0.112686 | 0.053937 |
| DAY28 | OD450    | 0.26241     | 0.149996 | 0.091551 | 0.160452 | 0.132607 |
|       | SD       | 0.227214    | 0.023943 | 0.05576  | 0.144506 | 0.120639 |
| DAY43 | OD450    | 0.392166    | 0.085002 | 0.061398 | 0.111629 | 0.098296 |
|       | SD       | 0.30982     | 0.017333 | 0.029924 | 0.117631 | 0.091619 |
| DAY57 | OD450    | 0.353759    | 0.303603 | 0.233039 | 0.159051 | 0.092303 |
|       | SD       | 0.44572     | 0.499597 | 0.399478 | 0.278766 | 0.163962 |

  

|       |          | MPV-M2(H3L) |          |          |          |          |          |          |          |          |          |
|-------|----------|-------------|----------|----------|----------|----------|----------|----------|----------|----------|----------|
| Time  | Dilution | 100         | 200      | 500      | 2000     | 5000     | 10000    |          |          |          |          |
| DAY7  | OD450    | 0.109292    | 0.047912 | 0.043693 | 0.007571 | 0.00732  | 0.007906 |          |          |          |          |
|       | SD       | 0.063703    | 0.035712 | 0.034848 | 0.005807 | 0.004975 | 0.003309 |          |          |          |          |
| DAY14 | OD450    | 0.394135    | 0.215507 | 0.102231 |          |          |          |          |          |          |          |
|       | SD       | 0.668346    | 0.369025 | 0.169339 |          |          |          |          |          |          |          |
| DAY28 | OD450    | 1.210556    | 0.933022 | 0.755858 | 0.454855 | 0.248675 | 0.150547 |          |          |          |          |
|       | SD       | 1.525566    | 1.235857 | 1.058179 | 0.680062 | 0.369316 | 0.217043 |          |          |          |          |
| DAY43 | OD450    | 0.954314    | 0.688217 | 0.519001 | 0.290459 | 0.147584 | 0.079034 |          |          |          |          |
|       | SD       | 1.115885    | 0.871134 | 0.593234 | 0.376457 | 0.194576 | 0.103097 |          |          |          |          |
| DAY57 | OD450    | 1.868655    | 1.555945 | 1.296377 | 1.04366  | 0.878963 | 0.594186 | 0.415137 | 0.336752 | 0.283184 | 0.242881 |
|       | SD       | 1.796705    | 1.661492 | 1.446237 | 1.050327 | 0.922301 | 0.660225 | 0.442447 | 0.33327  | 0.261854 | 0.240211 |

  

|       |          | MPV-M2(M1R) |          |          |          |          |          |          |          |          |          |
|-------|----------|-------------|----------|----------|----------|----------|----------|----------|----------|----------|----------|
| Time  | Dilution | 100         | 200      | 500      | 1000     | 10000    |          |          |          |          |          |
| DAY7  | OD450    | 0.219824    | 0.237241 | 0.104622 | 0.049037 | 0.011512 |          |          |          |          |          |
|       | SD       | 0.126748    | 0.1379   | 0.075278 | 0.034696 | 0.00488  |          |          |          |          |          |
| DAY14 | OD450    | 1.26431     | 0.921492 | 0.777768 | 0.547028 | 0.471314 | 0.298809 |          |          |          |          |
|       | SD       | 1.074702    | 0.90889  | 0.8148   | 0.607887 | 0.570678 | 0.350048 |          |          |          |          |
| DAY28 | OD450    | 3.401585    | 2.729831 | 1.889097 | 1.133399 | 0.636663 | 0.609779 | 0.841894 | 0.643447 | 0.525034 | 0.424627 |
|       | SD       | 0.479318    | 0.495983 | 0.540416 | 0.395875 | 0.267866 | 0.224665 | 0.359755 | 0.286482 | 0.247294 | 0.20219  |
| DAY43 | OD450    | 2.572125    | 1.901634 | 1.247632 | 0.688617 | 0.367152 | 0.369144 | 0.695985 | 0.544664 | 0.421329 | 0.363842 |
|       | SD       | 0.534167    | 0.628132 | 0.539427 | 0.34406  | 0.199695 | 0.206246 | 0.247776 | 0.187029 | 0.134902 | 0.126286 |
| DAY57 | OD450    | 0.235011    | 0.173547 | 0.13353  | 0.109081 | 0.090288 | 0.086891 | 0.089612 | 0.069305 | 0.068252 | 0.05763  |
|       | SD       | 0.07137     | 0.055816 | 0.044179 | 0.038797 | 0.03249  | 0.030139 | 0.050557 | 0.021516 | 0.025918 | 0.022638 |

\*SD:Standard Deviation

Table S2 ELISA analyses of binding of immunized sera on captured MPV antigens.

| MPV-M4(H3L) |          |          |          |          |          |          |          |          |          |          |         |          |          |
|-------------|----------|----------|----------|----------|----------|----------|----------|----------|----------|----------|---------|----------|----------|
| Time        | Dilution | 100      | 150      | 200      | 250      | 300      | 500      |          |          |          |         |          |          |
| DAY7        | OD450    | 0.138754 | 0.100427 | 0.074926 | 0.068417 | 0.052056 | 0.037421 |          |          |          |         |          |          |
|             | SD       | 0.16325  | 0.124079 | 0.095696 | 0.075811 | 0.064122 | 0.04276  |          |          |          |         |          |          |
| DAY14       | OD450    | 0.180844 | 0.094107 | 0.109094 | 0.067877 | 0.076671 | 0.050862 | 0.027789 |          |          |         |          |          |
|             | SD       | 0.136467 | 0.062464 | 0.08889  | 0.047396 | 0.058266 | 0.038097 | 0.015294 |          |          |         |          |          |
| DAY28       | OD450    | 0.724981 | 0.517394 | 0.410002 | 0.337808 | 0.287386 | 0.22055  | 0.187289 |          |          |         |          |          |
|             | SD       | 0.709599 | 0.560929 | 0.454599 | 0.374497 | 0.317885 | 0.249809 | 0.201926 |          |          |         |          |          |
| DAY43       | OD450    | 0.65519  | 0.494091 | 0.413718 | 0.349822 | 0.258971 | 0.204439 | 0.110079 |          |          |         |          |          |
|             | SD       | 0.436927 | 0.35112  | 0.295347 | 0.264589 | 0.185467 | 0.147413 | 0.081051 |          |          |         |          |          |
| DAY57       | OD450    | 1.213726 | 0.764357 | 0.580182 | 0.404955 | 0.272823 | 0.206859 | 0.142161 | 0.106773 | 0.089947 | 0.0764  | 0.146708 | 0.049754 |
|             | SD       | 0.589981 | 0.377499 | 0.305204 | 0.237857 | 0.16269  | 0.12188  | 0.091393 | 0.065163 | 0.055018 | 0.04908 | 0.206694 | 0.029207 |

  

| MPV-M4(M1R) |          |          |          |          |          |          |          |          |          |          |          |          |          |          |          |          |          |
|-------------|----------|----------|----------|----------|----------|----------|----------|----------|----------|----------|----------|----------|----------|----------|----------|----------|----------|
| Time        | Dilution | 100      | 150      | 200      | 250      | 300      | 500      |          |          |          |          |          |          |          |          |          |          |
| DAY7        | OD450    | 0.424116 | 0.295522 | 0.22855  | 0.194152 | 0.180854 | 0.111793 |          |          |          |          |          |          |          |          |          |          |
|             | SD       | 0.235467 | 0.178476 | 0.147074 | 0.135749 | 0.132514 | 0.079677 |          |          |          |          |          |          |          |          |          |          |
| DAY14       | OD450    | 1.131961 | 0.815061 | 0.640873 | 0.467243 | 0.428131 | 0.367805 | 0.327875 |          |          |          |          |          |          |          |          |          |
|             | SD       | 0.447959 | 0.296549 | 0.254278 | 0.172574 | 0.140866 | 0.170596 | 0.11623  |          |          |          |          |          |          |          |          |          |
| DAY28       | OD450    | 1.431384 | 1.267601 | 0.96758  | 0.85158  | 0.677613 | 0.576729 | 0.458772 | 0.514354 | 0.339087 | 0.229748 | 0.149175 | 0.112338 | 0.084276 | 0.071535 | 0.060033 | 0.058949 |
|             | SD       | 0.572742 | 0.523166 | 0.411082 | 0.370245 | 0.294822 | 0.257775 | 0.204248 | 0.221999 | 0.148543 | 0.103164 | 0.068555 | 0.053484 | 0.041891 | 0.03476  | 0.028346 | 0.02808  |
| DAY43       | OD450    | 1.376539 | 1.180472 | 0.861231 | 0.700877 | 0.561095 | 0.47731  | 0.3719   | 1.222223 | 1.058174 | 0.764295 | 0.617777 | 0.486616 | 0.405837 | 0.320137 |          |          |
|             | SD       | 0.54983  | 0.478108 | 0.359699 | 0.297497 | 0.232611 | 0.20288  | 0.158581 | 0.576849 | 0.507045 | 0.376765 | 0.32623  | 0.255082 | 0.22347  | 0.178793 |          |          |
| DAY57       | OD450    | 100000   | 150000   | 20000    | 250000   | 300000   | 350000   | 400000   | 450000   | 500000   | 550000   | 600000   | 800000   |          |          |          |          |
|             | SD       | 0.42336  | 0.275191 | 0.198717 | 0.152929 | 0.128091 | 0.108559 | 0.002997 | 0.085826 | 0.078962 | 0.069759 | 0.068642 | 0.051125 |          |          |          |          |
|             |          | 0.172131 | 0.114315 | 0.082332 | 0.064929 | 0.056919 | 0.048674 | 0.007506 | 0.033653 | 0.036198 | 0.033335 | 0.030403 | 0.023577 |          |          |          |          |

  

| MPV-M4(E8L) |          |          |          |          |          |          |          |          |          |          |          |          |          |          |          |          |          |          |          |          |          |
|-------------|----------|----------|----------|----------|----------|----------|----------|----------|----------|----------|----------|----------|----------|----------|----------|----------|----------|----------|----------|----------|----------|
| Time        | Dilution | 100      | 200      | 300      | 400      | 500      | 750      | 1000     | 2000     |          |          |          |          |          |          |          |          |          |          |          |          |
| DAY7        | OD450    | 1.085607 | 0.790104 | 0.609006 | 0.513994 | 0.451625 | 0.312405 | 0.243268 | 0.132126 |          |          |          |          |          |          |          |          |          |          |          |          |
|             | SD       | 1.311566 | 1.044403 | 0.826979 | 0.713429 | 0.636472 | 0.446859 | 0.35479  | 0.194006 |          |          |          |          |          |          |          |          |          |          |          |          |
| DAY14       | OD450    | 3.596736 | 2.829373 | 1.843156 | 1.343301 | 1.086071 | 0.580914 | 0.407693 | 0.321633 | 0.243077 | 0.190581 |          |          |          |          |          |          |          |          |          |          |
|             | SD       | 0.340654 | 0.253212 | 0.203227 | 0.154152 | 0.187722 | 0.103588 | 0.078902 | 0.061518 | 0.04346  | 0.0336   |          |          |          |          |          |          |          |          |          |          |
| DAY28       | OD450    | 100000   | 200000   | 220000   | 250000   | 280000   | 300000   | 320000   | 350000   | 450000   | 500000   | 520000   | 540000   | 560000   | 580000   | 600000   | 650000   | 680000   | 700000   | 800000   | 900000   |
|             | SD       | 1.252545 | 0.682753 | 0.597839 | 0.541436 | 0.492429 | 0.475773 | 0.453145 | 0.421892 | 0.445954 | 0.389621 | 0.369412 | 0.368397 | 0.360568 | 0.332563 | 0.335271 | 0.316672 | 0.310802 | 0.30419  | 0.265752 | 0.267814 |
| DAY43       | OD450    | 2.239225 | 1.68441  | 1.158838 | 0.144861 | 0.134933 | 0.135833 | 0.129051 | 0.116536 | 0.143391 | 0.379565 | 0.355862 | 0.357081 | 0.342491 | 0.338548 | 0.321762 | 0.308308 | 0.311362 | 0.307443 | 0.273475 | 0.27757  |
|             | SD       | 0.137289 | 0.293384 | 0.364829 | 0.355708 | 0.412073 | 0.45438  | 0.514359 | 0.415894 | 0.314223 | 0.275282 | 0.172439 |          |          |          |          |          |          |          |          |          |
| DAY57       | OD450    | 0.944793 | 0.721119 | 0.592453 | 0.531092 | 0.458331 | 0.369802 | 0.333157 | 0.273923 | 0.24383  | 0.209771 | 0.180107 | 0.100027 |          |          |          |          |          |          |          |          |
|             | SD       | 0.258946 | 0.213694 | 0.197842 | 0.173495 | 0.138456 | 0.119671 | 0.113134 | 0.092581 | 0.083696 | 0.071712 | 0.059006 | 0.033239 |          |          |          |          |          |          |          |          |

  

| MPV-M4(A29L) |          |          |          |          |          |          |          |          |          |          |          |          |          |  |  |
|--------------|----------|----------|----------|----------|----------|----------|----------|----------|----------|----------|----------|----------|----------|--|--|
| Time         | Dilution | 100      | 150      | 200      | 250      | 300      | 500      |          |          |          |          |          |          |  |  |
| DAY7         | OD450    | 0.231258 | 0.130988 | 0.098807 | 0.074399 | 0.065597 | 0.033819 |          |          |          |          |          |          |  |  |
|              | SD       | 0.103357 | 0.060415 | 0.033268 | 0.023679 | 0.027172 | 0.021305 |          |          |          |          |          |          |  |  |
| DAY14        | OD450    | 0.427548 | 0.247559 | 0.186936 | 0.140124 | 0.116194 | 0.062995 | 0.028348 |          |          |          |          |          |  |  |
|              | SD       | 0.266261 | 0.147567 | 0.115457 | 0.080345 | 0.075762 | 0.042825 | 0.016126 |          |          |          |          |          |  |  |
| DAY28        | OD450    | 1.212395 | 0.755971 | 0.542592 | 0.427385 | 0.34285  | 0.247157 | 0.201366 |          |          |          |          |          |  |  |
|              | SD       | 0.509763 | 0.334463 | 0.247062 | 0.202989 | 0.166718 | 0.129527 | 0.106264 |          |          |          |          |          |  |  |
| DAY43        | OD450    | 0.631555 | 0.425722 | 0.332814 | 0.276933 | 0.197894 | 0.147515 | 0.066883 |          |          |          |          |          |  |  |
|              | SD       | 0.238482 | 0.172516 | 0.138772 | 0.128487 | 0.09113  | 0.072785 | 0.039706 |          |          |          |          |          |  |  |
| DAY57        | OD450    | 0.99383  | 0.745668 | 0.667717 | 0.576478 | 0.509885 | 0.419072 | 0.369678 | 0.357461 | 0.257893 | 0.171728 | 0.129992 | 0.101373 |  |  |
|              | SD       | 0.406409 | 0.325764 | 0.301987 | 0.271549 | 0.238884 | 0.195206 | 0.188282 | 0.192792 | 0.131367 | 0.085315 | 0.066319 | 0.045195 |  |  |

\*SD:Standard Deviation

Table S2 ELISA analyses of binding of immunized sera on captured MPV antigens.

|       |          | MPV-EM6(A35R)                                                                                                                                                                                                                                                                                                                     |                                                                                                                                                                                                                                                                                                                    |                                                                                                                                                                                                                                                                                                     |                                                                                                                                                                                                                                                                                      |                                                                                                                                                                                                                                                                       |                                                                                                                                                                                                                                                        |                                                                                                                                                                                                                                         |                                                                                                                                                                                                                          |                                                                                                                                                                                                           |                                                                                                                                                                                            |                                                                                                                                                                             |                                                                                                                                                              |                                                                                                                                               |                                                                                                                                |                                                                                                                 |                                                                                                  |                                                                                   |                                                                    |                                                     |                                      |                      |          |
|-------|----------|-----------------------------------------------------------------------------------------------------------------------------------------------------------------------------------------------------------------------------------------------------------------------------------------------------------------------------------|--------------------------------------------------------------------------------------------------------------------------------------------------------------------------------------------------------------------------------------------------------------------------------------------------------------------|-----------------------------------------------------------------------------------------------------------------------------------------------------------------------------------------------------------------------------------------------------------------------------------------------------|--------------------------------------------------------------------------------------------------------------------------------------------------------------------------------------------------------------------------------------------------------------------------------------|-----------------------------------------------------------------------------------------------------------------------------------------------------------------------------------------------------------------------------------------------------------------------|--------------------------------------------------------------------------------------------------------------------------------------------------------------------------------------------------------------------------------------------------------|-----------------------------------------------------------------------------------------------------------------------------------------------------------------------------------------------------------------------------------------|--------------------------------------------------------------------------------------------------------------------------------------------------------------------------------------------------------------------------|-----------------------------------------------------------------------------------------------------------------------------------------------------------------------------------------------------------|--------------------------------------------------------------------------------------------------------------------------------------------------------------------------------------------|-----------------------------------------------------------------------------------------------------------------------------------------------------------------------------|--------------------------------------------------------------------------------------------------------------------------------------------------------------|-----------------------------------------------------------------------------------------------------------------------------------------------|--------------------------------------------------------------------------------------------------------------------------------|-----------------------------------------------------------------------------------------------------------------|--------------------------------------------------------------------------------------------------|-----------------------------------------------------------------------------------|--------------------------------------------------------------------|-----------------------------------------------------|--------------------------------------|----------------------|----------|
| Time  | Dilution | 100                                                                                                                                                                                                                                                                                                                               | 200                                                                                                                                                                                                                                                                                                                | 400                                                                                                                                                                                                                                                                                                 | 500                                                                                                                                                                                                                                                                                  | 1000                                                                                                                                                                                                                                                                  | 1500                                                                                                                                                                                                                                                   | 2000                                                                                                                                                                                                                                    | 2500                                                                                                                                                                                                                     | 3000                                                                                                                                                                                                      |                                                                                                                                                                                            |                                                                                                                                                                             |                                                                                                                                                              |                                                                                                                                               |                                                                                                                                |                                                                                                                 |                                                                                                  |                                                                                   |                                                                    |                                                     |                                      |                      |          |
| DAY7  | OD450    | 0.45294                                                                                                                                                                                                                                                                                                                           | 0.242283                                                                                                                                                                                                                                                                                                           | 0.152362                                                                                                                                                                                                                                                                                            | 0.128203                                                                                                                                                                                                                                                                             | 0.051782                                                                                                                                                                                                                                                              | 0.271809                                                                                                                                                                                                                                               | 0.204881                                                                                                                                                                                                                                | 0.17901                                                                                                                                                                                                                  | 0.135553                                                                                                                                                                                                  | 0.097991                                                                                                                                                                                   |                                                                                                                                                                             |                                                                                                                                                              |                                                                                                                                               |                                                                                                                                |                                                                                                                 |                                                                                                  |                                                                                   |                                                                    |                                                     |                                      |                      |          |
|       | SD       | 0.542046                                                                                                                                                                                                                                                                                                                          | 0.276079                                                                                                                                                                                                                                                                                                           | 0.185387                                                                                                                                                                                                                                                                                            | 0.148187                                                                                                                                                                                                                                                                             | 0.489657                                                                                                                                                                                                                                                              | 0.240545                                                                                                                                                                                                                                               | 0.146221                                                                                                                                                                                                                                | 0.081846                                                                                                                                                                                                                 | 0.054741                                                                                                                                                                                                  | 0.047584                                                                                                                                                                                   |                                                                                                                                                                             |                                                                                                                                                              |                                                                                                                                               |                                                                                                                                |                                                                                                                 |                                                                                                  |                                                                                   |                                                                    |                                                     |                                      |                      |          |
| DAY14 | Time     | 2000                                                                                                                                                                                                                                                                                                                              | 4000                                                                                                                                                                                                                                                                                                               | 6000                                                                                                                                                                                                                                                                                                | 8000                                                                                                                                                                                                                                                                                 | 10000                                                                                                                                                                                                                                                                 | 12000                                                                                                                                                                                                                                                  | 20000                                                                                                                                                                                                                                   | 25000                                                                                                                                                                                                                    |                                                                                                                                                                                                           |                                                                                                                                                                                            |                                                                                                                                                                             |                                                                                                                                                              |                                                                                                                                               |                                                                                                                                |                                                                                                                 |                                                                                                  |                                                                                   |                                                                    |                                                     |                                      |                      |          |
|       | OD450    | 0.881378                                                                                                                                                                                                                                                                                                                          | 0.341338                                                                                                                                                                                                                                                                                                           | 0.217616                                                                                                                                                                                                                                                                                            | 0.153123                                                                                                                                                                                                                                                                             | 0.135098                                                                                                                                                                                                                                                              | 0.106668                                                                                                                                                                                                                                               | 0.097941                                                                                                                                                                                                                                | 0.074428                                                                                                                                                                                                                 |                                                                                                                                                                                                           |                                                                                                                                                                                            |                                                                                                                                                                             |                                                                                                                                                              |                                                                                                                                               |                                                                                                                                |                                                                                                                 |                                                                                                  |                                                                                   |                                                                    |                                                     |                                      |                      |          |
| DAY28 | Time     | 20000                                                                                                                                                                                                                                                                                                                             | 50000                                                                                                                                                                                                                                                                                                              | 100000                                                                                                                                                                                                                                                                                              | 150000                                                                                                                                                                                                                                                                               | 250000                                                                                                                                                                                                                                                                | 500000                                                                                                                                                                                                                                                 | 1000000                                                                                                                                                                                                                                 |                                                                                                                                                                                                                          |                                                                                                                                                                                                           |                                                                                                                                                                                            |                                                                                                                                                                             |                                                                                                                                                              |                                                                                                                                               |                                                                                                                                |                                                                                                                 |                                                                                                  |                                                                                   |                                                                    |                                                     |                                      |                      |          |
|       | OD450    | 0.426458                                                                                                                                                                                                                                                                                                                          | 0.226265                                                                                                                                                                                                                                                                                                           | 0.151082                                                                                                                                                                                                                                                                                            | 0.111224                                                                                                                                                                                                                                                                             | 0.084727                                                                                                                                                                                                                                                              | 0.072169                                                                                                                                                                                                                                               | 0.055511                                                                                                                                                                                                                                | 0.033886                                                                                                                                                                                                                 |                                                                                                                                                                                                           |                                                                                                                                                                                            |                                                                                                                                                                             |                                                                                                                                                              |                                                                                                                                               |                                                                                                                                |                                                                                                                 |                                                                                                  |                                                                                   |                                                                    |                                                     |                                      |                      |          |
| DAY43 | Time     | 30000                                                                                                                                                                                                                                                                                                                             | 50000                                                                                                                                                                                                                                                                                                              | 100000                                                                                                                                                                                                                                                                                              | 150000                                                                                                                                                                                                                                                                               | 250000                                                                                                                                                                                                                                                                | 500000                                                                                                                                                                                                                                                 | 1000000                                                                                                                                                                                                                                 |                                                                                                                                                                                                                          |                                                                                                                                                                                                           |                                                                                                                                                                                            |                                                                                                                                                                             |                                                                                                                                                              |                                                                                                                                               |                                                                                                                                |                                                                                                                 |                                                                                                  |                                                                                   |                                                                    |                                                     |                                      |                      |          |
|       | OD450    | 1.44361                                                                                                                                                                                                                                                                                                                           | 0.71322                                                                                                                                                                                                                                                                                                            | 0.29722                                                                                                                                                                                                                                                                                             | 0.250096                                                                                                                                                                                                                                                                             | 0.173276                                                                                                                                                                                                                                                              | 0.080742                                                                                                                                                                                                                                               | 0.0307                                                                                                                                                                                                                                  |                                                                                                                                                                                                                          |                                                                                                                                                                                                           |                                                                                                                                                                                            |                                                                                                                                                                             |                                                                                                                                                              |                                                                                                                                               |                                                                                                                                |                                                                                                                 |                                                                                                  |                                                                                   |                                                                    |                                                     |                                      |                      |          |
| DAY57 | Time     | 100000                                                                                                                                                                                                                                                                                                                            | 150000                                                                                                                                                                                                                                                                                                             | 200000                                                                                                                                                                                                                                                                                              | 250000                                                                                                                                                                                                                                                                               | 300000                                                                                                                                                                                                                                                                | 350000                                                                                                                                                                                                                                                 | 400000                                                                                                                                                                                                                                  | 450000                                                                                                                                                                                                                   | 500000                                                                                                                                                                                                    | 750000                                                                                                                                                                                     | 800000                                                                                                                                                                      | 1000000                                                                                                                                                      |                                                                                                                                               |                                                                                                                                |                                                                                                                 |                                                                                                  |                                                                                   |                                                                    |                                                     |                                      |                      |          |
|       | OD450    | 0.771817                                                                                                                                                                                                                                                                                                                          | 0.44923                                                                                                                                                                                                                                                                                                            | 0.359066                                                                                                                                                                                                                                                                                            | 0.286372                                                                                                                                                                                                                                                                             | 0.242556                                                                                                                                                                                                                                                              | 0.197393                                                                                                                                                                                                                                               | 0.184416                                                                                                                                                                                                                                | 0.15661                                                                                                                                                                                                                  | 0.133634                                                                                                                                                                                                  | 0.082993                                                                                                                                                                                   | 0.053199                                                                                                                                                                    | 0.086568                                                                                                                                                     |                                                                                                                                               |                                                                                                                                |                                                                                                                 |                                                                                                  |                                                                                   |                                                                    |                                                     |                                      |                      |          |
|       | SD       | 0.355489                                                                                                                                                                                                                                                                                                                          | 0.215896                                                                                                                                                                                                                                                                                                           | 0.161678                                                                                                                                                                                                                                                                                            | 0.121979                                                                                                                                                                                                                                                                             | 0.091901                                                                                                                                                                                                                                                              | 0.093066                                                                                                                                                                                                                                               | 0.081241                                                                                                                                                                                                                                | 0.064157                                                                                                                                                                                                                 | 0.050307                                                                                                                                                                                                  | 0.037651                                                                                                                                                                                   | 0.033916                                                                                                                                                                    | 0.040827                                                                                                                                                     |                                                                                                                                               |                                                                                                                                |                                                                                                                 |                                                                                                  |                                                                                   |                                                                    |                                                     |                                      |                      |          |
|       |          |                                                                                                                                                                                                                                                                                                                                   |                                                                                                                                                                                                                                                                                                                    |                                                                                                                                                                                                                                                                                                     |                                                                                                                                                                                                                                                                                      |                                                                                                                                                                                                                                                                       |                                                                                                                                                                                                                                                        |                                                                                                                                                                                                                                         |                                                                                                                                                                                                                          |                                                                                                                                                                                                           |                                                                                                                                                                                            |                                                                                                                                                                             |                                                                                                                                                              |                                                                                                                                               |                                                                                                                                |                                                                                                                 |                                                                                                  |                                                                                   |                                                                    |                                                     |                                      |                      |          |
|       |          | MPV-EM6(B6R)                                                                                                                                                                                                                                                                                                                      |                                                                                                                                                                                                                                                                                                                    |                                                                                                                                                                                                                                                                                                     |                                                                                                                                                                                                                                                                                      |                                                                                                                                                                                                                                                                       |                                                                                                                                                                                                                                                        |                                                                                                                                                                                                                                         |                                                                                                                                                                                                                          |                                                                                                                                                                                                           |                                                                                                                                                                                            |                                                                                                                                                                             |                                                                                                                                                              |                                                                                                                                               |                                                                                                                                |                                                                                                                 |                                                                                                  |                                                                                   |                                                                    |                                                     |                                      |                      |          |
| Time  | Dilution | 100                                                                                                                                                                                                                                                                                                                               | 150                                                                                                                                                                                                                                                                                                                | 200                                                                                                                                                                                                                                                                                                 | 250                                                                                                                                                                                                                                                                                  | 300                                                                                                                                                                                                                                                                   | 500                                                                                                                                                                                                                                                    | 100                                                                                                                                                                                                                                     | 150                                                                                                                                                                                                                      | 200                                                                                                                                                                                                       | 250                                                                                                                                                                                        | 300                                                                                                                                                                         | 500                                                                                                                                                          |                                                                                                                                               |                                                                                                                                |                                                                                                                 |                                                                                                  |                                                                                   |                                                                    |                                                     |                                      |                      |          |
| DAY7  | OD450    | 0.22134                                                                                                                                                                                                                                                                                                                           | 0.093018                                                                                                                                                                                                                                                                                                           | 0.103555                                                                                                                                                                                                                                                                                            | 0.070013                                                                                                                                                                                                                                                                             | 0.062931                                                                                                                                                                                                                                                              | 0.047158                                                                                                                                                                                                                                               | 0.287024                                                                                                                                                                                                                                | 0.205462                                                                                                                                                                                                                 | 0.159119                                                                                                                                                                                                  | 0.156727                                                                                                                                                                                   | 0.116261                                                                                                                                                                    | 0.073474                                                                                                                                                     |                                                                                                                                               |                                                                                                                                |                                                                                                                 |                                                                                                  |                                                                                   |                                                                    |                                                     |                                      |                      |          |
|       | SD       | 0.192412                                                                                                                                                                                                                                                                                                                          | 0.091146                                                                                                                                                                                                                                                                                                           | 0.090929                                                                                                                                                                                                                                                                                            | 0.078956                                                                                                                                                                                                                                                                             | 0.065635                                                                                                                                                                                                                                                              | 0.060339                                                                                                                                                                                                                                               | 0.144819                                                                                                                                                                                                                                | 0.100663                                                                                                                                                                                                                 | 0.075027                                                                                                                                                                                                  | 0.082966                                                                                                                                                                                   | 0.049823                                                                                                                                                                    | 0.029006                                                                                                                                                     |                                                                                                                                               |                                                                                                                                |                                                                                                                 |                                                                                                  |                                                                                   |                                                                    |                                                     |                                      |                      |          |
| DAY14 | Time     | 100 <td>150 <td>200 <td>250 <td>300 <td>500</td> <td colspan="6"></td> </td></td></td></td>                                                                                                                                                                                                                                       | 150 <td>200 <td>250 <td>300 <td>500</td> <td colspan="6"></td> </td></td></td>                                                                                                                                                                                                                                     | 200 <td>250 <td>300 <td>500</td> <td colspan="6"></td> </td></td>                                                                                                                                                                                                                                   | 250 <td>300 <td>500</td> <td colspan="6"></td> </td>                                                                                                                                                                                                                                 | 300 <td>500</td> <td colspan="6"></td>                                                                                                                                                                                                                                | 500                                                                                                                                                                                                                                                    |                                                                                                                                                                                                                                         |                                                                                                                                                                                                                          |                                                                                                                                                                                                           |                                                                                                                                                                                            |                                                                                                                                                                             |                                                                                                                                                              |                                                                                                                                               |                                                                                                                                |                                                                                                                 |                                                                                                  |                                                                                   |                                                                    |                                                     |                                      |                      |          |
|       | OD450    | 0.287024                                                                                                                                                                                                                                                                                                                          | 0.205462                                                                                                                                                                                                                                                                                                           | 0.159119                                                                                                                                                                                                                                                                                            | 0.156727                                                                                                                                                                                                                                                                             | 0.116261                                                                                                                                                                                                                                                              | 0.073474                                                                                                                                                                                                                                               |                                                                                                                                                                                                                                         |                                                                                                                                                                                                                          |                                                                                                                                                                                                           |                                                                                                                                                                                            |                                                                                                                                                                             |                                                                                                                                                              |                                                                                                                                               |                                                                                                                                |                                                                                                                 |                                                                                                  |                                                                                   |                                                                    |                                                     |                                      |                      |          |
| DAY28 | Time     | 500 <td>750 <td>1000 <td>1500 <td>2500 <td>5000 <td>5400 <td>6000 <td>6500 <td>7000 <td>8000 <td>9000 <td>10000 <td>12000 <td>13000 <td>14000 <td>15000 <td>17000 <td>20000 <td>25000 <td>30000</td> </td></td></td></td></td></td></td></td></td></td></td></td></td></td></td></td></td></td></td>                              | 750 <td>1000 <td>1500 <td>2500 <td>5000 <td>5400 <td>6000 <td>6500 <td>7000 <td>8000 <td>9000 <td>10000 <td>12000 <td>13000 <td>14000 <td>15000 <td>17000 <td>20000 <td>25000 <td>30000</td> </td></td></td></td></td></td></td></td></td></td></td></td></td></td></td></td></td></td>                            | 1000 <td>1500 <td>2500 <td>5000 <td>5400 <td>6000 <td>6500 <td>7000 <td>8000 <td>9000 <td>10000 <td>12000 <td>13000 <td>14000 <td>15000 <td>17000 <td>20000 <td>25000 <td>30000</td> </td></td></td></td></td></td></td></td></td></td></td></td></td></td></td></td></td>                          | 1500 <td>2500 <td>5000 <td>5400 <td>6000 <td>6500 <td>7000 <td>8000 <td>9000 <td>10000 <td>12000 <td>13000 <td>14000 <td>15000 <td>17000 <td>20000 <td>25000 <td>30000</td> </td></td></td></td></td></td></td></td></td></td></td></td></td></td></td></td>                         | 2500 <td>5000 <td>5400 <td>6000 <td>6500 <td>7000 <td>8000 <td>9000 <td>10000 <td>12000 <td>13000 <td>14000 <td>15000 <td>17000 <td>20000 <td>25000 <td>30000</td> </td></td></td></td></td></td></td></td></td></td></td></td></td></td></td>                        | 5000 <td>5400 <td>6000 <td>6500 <td>7000 <td>8000 <td>9000 <td>10000 <td>12000 <td>13000 <td>14000 <td>15000 <td>17000 <td>20000 <td>25000 <td>30000</td> </td></td></td></td></td></td></td></td></td></td></td></td></td></td>                       | 5400 <td>6000 <td>6500 <td>7000 <td>8000 <td>9000 <td>10000 <td>12000 <td>13000 <td>14000 <td>15000 <td>17000 <td>20000 <td>25000 <td>30000</td> </td></td></td></td></td></td></td></td></td></td></td></td></td>                      | 6000 <td>6500 <td>7000 <td>8000 <td>9000 <td>10000 <td>12000 <td>13000 <td>14000 <td>15000 <td>17000 <td>20000 <td>25000 <td>30000</td> </td></td></td></td></td></td></td></td></td></td></td></td>                     | 6500 <td>7000 <td>8000 <td>9000 <td>10000 <td>12000 <td>13000 <td>14000 <td>15000 <td>17000 <td>20000 <td>25000 <td>30000</td> </td></td></td></td></td></td></td></td></td></td></td>                    | 7000 <td>8000 <td>9000 <td>10000 <td>12000 <td>13000 <td>14000 <td>15000 <td>17000 <td>20000 <td>25000 <td>30000</td> </td></td></td></td></td></td></td></td></td></td>                   | 8000 <td>9000 <td>10000 <td>12000 <td>13000 <td>14000 <td>15000 <td>17000 <td>20000 <td>25000 <td>30000</td> </td></td></td></td></td></td></td></td></td>                  | 9000 <td>10000 <td>12000 <td>13000 <td>14000 <td>15000 <td>17000 <td>20000 <td>25000 <td>30000</td> </td></td></td></td></td></td></td></td>                 | 10000 <td>12000 <td>13000 <td>14000 <td>15000 <td>17000 <td>20000 <td>25000 <td>30000</td> </td></td></td></td></td></td></td>                | 12000 <td>13000 <td>14000 <td>15000 <td>17000 <td>20000 <td>25000 <td>30000</td> </td></td></td></td></td></td>                | 13000 <td>14000 <td>15000 <td>17000 <td>20000 <td>25000 <td>30000</td> </td></td></td></td></td>                | 14000 <td>15000 <td>17000 <td>20000 <td>25000 <td>30000</td> </td></td></td></td>                | 15000 <td>17000 <td>20000 <td>25000 <td>30000</td> </td></td></td>                | 17000 <td>20000 <td>25000 <td>30000</td> </td></td>                | 20000 <td>25000 <td>30000</td> </td>                | 25000 <td>30000</td>                 | 30000                |          |
|       | OD450    | 0.901618                                                                                                                                                                                                                                                                                                                          | 0.758833                                                                                                                                                                                                                                                                                                           | 0.696563                                                                                                                                                                                                                                                                                            | 0.560317                                                                                                                                                                                                                                                                             | 0.430799                                                                                                                                                                                                                                                              | 0.386429                                                                                                                                                                                                                                               | 0.308456                                                                                                                                                                                                                                | 0.321196                                                                                                                                                                                                                 | 0.276151                                                                                                                                                                                                  | 0.258628                                                                                                                                                                                   | 0.278351                                                                                                                                                                    | 0.220667                                                                                                                                                     | 0.209638                                                                                                                                      | 0.189405                                                                                                                       | 0.178506                                                                                                        | 0.110379                                                                                         | 0.101048                                                                          | 0.094714                                                           | 0.087732                                            | 0.076986                             | 0.083111             | 0.086087 |
| DAY43 | Time     | 1000 <td>1200 <td>1400 <td>1500 <td>1700 <td>2000 <td>2500 <td>2700 <td>3000 <td>3500</td> <td colspan="11"></td> </td></td></td></td></td></td></td></td>                                                                                                                                                                        | 1200 <td>1400 <td>1500 <td>1700 <td>2000 <td>2500 <td>2700 <td>3000 <td>3500</td> <td colspan="11"></td> </td></td></td></td></td></td></td>                                                                                                                                                                       | 1400 <td>1500 <td>1700 <td>2000 <td>2500 <td>2700 <td>3000 <td>3500</td> <td colspan="11"></td> </td></td></td></td></td></td>                                                                                                                                                                      | 1500 <td>1700 <td>2000 <td>2500 <td>2700 <td>3000 <td>3500</td> <td colspan="11"></td> </td></td></td></td></td>                                                                                                                                                                     | 1700 <td>2000 <td>2500 <td>2700 <td>3000 <td>3500</td> <td colspan="11"></td> </td></td></td></td>                                                                                                                                                                    | 2000 <td>2500 <td>2700 <td>3000 <td>3500</td> <td colspan="11"></td> </td></td></td>                                                                                                                                                                   | 2500 <td>2700 <td>3000 <td>3500</td> <td colspan="11"></td> </td></td>                                                                                                                                                                  | 2700 <td>3000 <td>3500</td> <td colspan="11"></td> </td>                                                                                                                                                                 | 3000 <td>3500</td> <td colspan="11"></td>                                                                                                                                                                 | 3500                                                                                                                                                                                       |                                                                                                                                                                             |                                                                                                                                                              |                                                                                                                                               |                                                                                                                                |                                                                                                                 |                                                                                                  |                                                                                   |                                                                    |                                                     |                                      |                      |          |
|       | OD450    | 1.381032                                                                                                                                                                                                                                                                                                                          | 1.032162                                                                                                                                                                                                                                                                                                           | 0.893378                                                                                                                                                                                                                                                                                            | 0.663373                                                                                                                                                                                                                                                                             | 0.516335                                                                                                                                                                                                                                                              | 0.416592                                                                                                                                                                                                                                               | 0.322857                                                                                                                                                                                                                                | 0.253605                                                                                                                                                                                                                 | 0.227084                                                                                                                                                                                                  | 0.246358                                                                                                                                                                                   | 0.230854                                                                                                                                                                    | 0.21322                                                                                                                                                      | 0.198974                                                                                                                                      | 0.194025                                                                                                                       | 0.227715                                                                                                        | 0.109459                                                                                         | 0.104771                                                                          | 0.09794                                                            | 0.086111                                            | 0.072647                             | 0.061315             | 0.047704 |
| DAY57 | Time     | 3000 <td>4000 <td>5000 <td>6000 <td>7000 <td>8000 <td>10000 <td>15000 <td>20000 <td>25000 <td>30000 <td>35000</td> <td colspan="9"></td> </td></td></td></td></td></td></td></td></td></td>                                                                                                                                       | 4000 <td>5000 <td>6000 <td>7000 <td>8000 <td>10000 <td>15000 <td>20000 <td>25000 <td>30000 <td>35000</td> <td colspan="9"></td> </td></td></td></td></td></td></td></td></td>                                                                                                                                      | 5000 <td>6000 <td>7000 <td>8000 <td>10000 <td>15000 <td>20000 <td>25000 <td>30000 <td>35000</td> <td colspan="9"></td> </td></td></td></td></td></td></td></td>                                                                                                                                     | 6000 <td>7000 <td>8000 <td>10000 <td>15000 <td>20000 <td>25000 <td>30000 <td>35000</td> <td colspan="9"></td> </td></td></td></td></td></td></td>                                                                                                                                    | 7000 <td>8000 <td>10000 <td>15000 <td>20000 <td>25000 <td>30000 <td>35000</td> <td colspan="9"></td> </td></td></td></td></td></td>                                                                                                                                   | 8000 <td>10000 <td>15000 <td>20000 <td>25000 <td>30000 <td>35000</td> <td colspan="9"></td> </td></td></td></td></td>                                                                                                                                  | 10000 <td>15000 <td>20000 <td>25000 <td>30000 <td>35000</td> <td colspan="9"></td> </td></td></td></td>                                                                                                                                 | 15000 <td>20000 <td>25000 <td>30000 <td>35000</td> <td colspan="9"></td> </td></td></td>                                                                                                                                 | 20000 <td>25000 <td>30000 <td>35000</td> <td colspan="9"></td> </td></td>                                                                                                                                 | 25000 <td>30000 <td>35000</td> <td colspan="9"></td> </td>                                                                                                                                 | 30000 <td>35000</td> <td colspan="9"></td>                                                                                                                                  | 35000                                                                                                                                                        |                                                                                                                                               |                                                                                                                                |                                                                                                                 |                                                                                                  |                                                                                   |                                                                    |                                                     |                                      |                      |          |
|       | OD450    | 0.670247                                                                                                                                                                                                                                                                                                                          | 0.471208                                                                                                                                                                                                                                                                                                           | 0.412598                                                                                                                                                                                                                                                                                            | 0.304942                                                                                                                                                                                                                                                                             | 0.255097                                                                                                                                                                                                                                                              | 0.178939                                                                                                                                                                                                                                               | 0.138445                                                                                                                                                                                                                                | 0.128799                                                                                                                                                                                                                 | 0.115363                                                                                                                                                                                                  | 0.062717                                                                                                                                                                                   | 0.030769                                                                                                                                                                    | 0.062702                                                                                                                                                     | 0.080505                                                                                                                                      | 0.071141                                                                                                                       | 0.032046                                                                                                        | 0.021977                                                                                         | 0.017437                                                                          | 0.018273                                                           | 0.016909                                            | 0.01819                              | 0.016269             | 0.012832 |
|       | SD       | 0.145524                                                                                                                                                                                                                                                                                                                          | 0.118069                                                                                                                                                                                                                                                                                                           | 0.106437                                                                                                                                                                                                                                                                                            | 0.094373                                                                                                                                                                                                                                                                             | 0.089635                                                                                                                                                                                                                                                              | 0.084238                                                                                                                                                                                                                                               | 0.075301                                                                                                                                                                                                                                | 0.068846                                                                                                                                                                                                                 | 0.065049                                                                                                                                                                                                  | 0.058669                                                                                                                                                                                   | 0.053916                                                                                                                                                                    | 0.042726                                                                                                                                                     |                                                                                                                                               |                                                                                                                                |                                                                                                                 |                                                                                                  |                                                                                   |                                                                    |                                                     |                                      |                      |          |
|       |          |                                                                                                                                                                                                                                                                                                                                   |                                                                                                                                                                                                                                                                                                                    |                                                                                                                                                                                                                                                                                                     |                                                                                                                                                                                                                                                                                      |                                                                                                                                                                                                                                                                       |                                                                                                                                                                                                                                                        |                                                                                                                                                                                                                                         |                                                                                                                                                                                                                          |                                                                                                                                                                                                           |                                                                                                                                                                                            |                                                                                                                                                                             |                                                                                                                                                              |                                                                                                                                               |                                                                                                                                |                                                                                                                 |                                                                                                  |                                                                                   |                                                                    |                                                     |                                      |                      |          |
|       |          | MPV-EM6(H3L)                                                                                                                                                                                                                                                                                                                      |                                                                                                                                                                                                                                                                                                                    |                                                                                                                                                                                                                                                                                                     |                                                                                                                                                                                                                                                                                      |                                                                                                                                                                                                                                                                       |                                                                                                                                                                                                                                                        |                                                                                                                                                                                                                                         |                                                                                                                                                                                                                          |                                                                                                                                                                                                           |                                                                                                                                                                                            |                                                                                                                                                                             |                                                                                                                                                              |                                                                                                                                               |                                                                                                                                |                                                                                                                 |                                                                                                  |                                                                                   |                                                                    |                                                     |                                      |                      |          |
| Time  | Dilution | 100                                                                                                                                                                                                                                                                                                                               | 190                                                                                                                                                                                                                                                                                                                | 200                                                                                                                                                                                                                                                                                                 | 250                                                                                                                                                                                                                                                                                  | 300                                                                                                                                                                                                                                                                   | 500                                                                                                                                                                                                                                                    |                                                                                                                                                                                                                                         |                                                                                                                                                                                                                          |                                                                                                                                                                                                           |                                                                                                                                                                                            |                                                                                                                                                                             |                                                                                                                                                              |                                                                                                                                               |                                                                                                                                |                                                                                                                 |                                                                                                  |                                                                                   |                                                                    |                                                     |                                      |                      |          |
| DAY7  | OD450    | 0.12958                                                                                                                                                                                                                                                                                                                           | 0.04242                                                                                                                                                                                                                                                                                                            | 0.049448                                                                                                                                                                                                                                                                                            | 0.039614                                                                                                                                                                                                                                                                             | 0.03242                                                                                                                                                                                                                                                               | 0.013025                                                                                                                                                                                                                                               |                                                                                                                                                                                                                                         |                                                                                                                                                                                                                          |                                                                                                                                                                                                           |                                                                                                                                                                                            |                                                                                                                                                                             |                                                                                                                                                              |                                                                                                                                               |                                                                                                                                |                                                                                                                 |                                                                                                  |                                                                                   |                                                                    |                                                     |                                      |                      |          |
|       | SD       | 0.106214                                                                                                                                                                                                                                                                                                                          | 0.046764                                                                                                                                                                                                                                                                                                           | 0.051344                                                                                                                                                                                                                                                                                            | 0.036761                                                                                                                                                                                                                                                                             | 0.031899                                                                                                                                                                                                                                                              | 0.01562                                                                                                                                                                                                                                                |                                                                                                                                                                                                                                         |                                                                                                                                                                                                                          |                                                                                                                                                                                                           |                                                                                                                                                                                            |                                                                                                                                                                             |                                                                                                                                                              |                                                                                                                                               |                                                                                                                                |                                                                                                                 |                                                                                                  |                                                                                   |                                                                    |                                                     |                                      |                      |          |
| DAY14 | Time     | 100 <td>150 <td>200 <td>250 <td>300 <td>500</td> <td colspan="5"></td> </td></td></td></td>                                                                                                                                                                                                                                       | 150 <td>200 <td>250 <td>300 <td>500</td> <td colspan="5"></td> </td></td></td>                                                                                                                                                                                                                                     | 200 <td>250 <td>300 <td>500</td> <td colspan="5"></td> </td></td>                                                                                                                                                                                                                                   | 250 <td>300 <td>500</td> <td colspan="5"></td> </td>                                                                                                                                                                                                                                 | 300 <td>500</td> <td colspan="5"></td>                                                                                                                                                                                                                                | 500                                                                                                                                                                                                                                                    |                                                                                                                                                                                                                                         |                                                                                                                                                                                                                          |                                                                                                                                                                                                           |                                                                                                                                                                                            |                                                                                                                                                                             |                                                                                                                                                              |                                                                                                                                               |                                                                                                                                |                                                                                                                 |                                                                                                  |                                                                                   |                                                                    |                                                     |                                      |                      |          |
|       | OD450    | 0.139799                                                                                                                                                                                                                                                                                                                          | 0.09595                                                                                                                                                                                                                                                                                                            | 0.071689                                                                                                                                                                                                                                                                                            | 0.051816                                                                                                                                                                                                                                                                             | 0.042712                                                                                                                                                                                                                                                              | 0.028102                                                                                                                                                                                                                                               |                                                                                                                                                                                                                                         |                                                                                                                                                                                                                          |                                                                                                                                                                                                           |                                                                                                                                                                                            |                                                                                                                                                                             |                                                                                                                                                              |                                                                                                                                               |                                                                                                                                |                                                                                                                 |                                                                                                  |                                                                                   |                                                                    |                                                     |                                      |                      |          |
| DAY28 | Time     | 1000 <td>2000 <td>4000 <td>6000 <td>8000 <td>10000 <td>20000</td> <td colspan="4"></td> </td></td></td></td></td>                                                                                                                                                                                                                 | 2000 <td>4000 <td>6000 <td>8000 <td>10000 <td>20000</td> <td colspan="4"></td> </td></td></td></td>                                                                                                                                                                                                                | 4000 <td>6000 <td>8000 <td>10000 <td>20000</td> <td colspan="4"></td> </td></td></td>                                                                                                                                                                                                               | 6000 <td>8000 <td>10000 <td>20000</td> <td colspan="4"></td> </td></td>                                                                                                                                                                                                              | 8000 <td>10000 <td>20000</td> <td colspan="4"></td> </td>                                                                                                                                                                                                             | 10000 <td>20000</td> <td colspan="4"></td>                                                                                                                                                                                                             | 20000                                                                                                                                                                                                                                   |                                                                                                                                                                                                                          |                                                                                                                                                                                                           |                                                                                                                                                                                            |                                                                                                                                                                             |                                                                                                                                                              |                                                                                                                                               |                                                                                                                                |                                                                                                                 |                                                                                                  |                                                                                   |                                                                    |                                                     |                                      |                      |          |
|       | OD450    | 1.140052                                                                                                                                                                                                                                                                                                                          | 0.645716                                                                                                                                                                                                                                                                                                           | 0.389769                                                                                                                                                                                                                                                                                            | 0.278164                                                                                                                                                                                                                                                                             | 0.244694                                                                                                                                                                                                                                                              | 0.183457                                                                                                                                                                                                                                               | 0.091947                                                                                                                                                                                                                                |                                                                                                                                                                                                                          |                                                                                                                                                                                                           |                                                                                                                                                                                            |                                                                                                                                                                             |                                                                                                                                                              |                                                                                                                                               |                                                                                                                                |                                                                                                                 |                                                                                                  |                                                                                   |                                                                    |                                                     |                                      |                      |          |
| DAY43 | Time     | 2000 <td>4000 <td>5000 <td>6000 <td>8000 <td>10000 <td>20000</td> <td colspan="4"></td> </td></td></td></td></td>                                                                                                                                                                                                                 | 4000 <td>5000 <td>6000 <td>8000 <td>10000 <td>20000</td> <td colspan="4"></td> </td></td></td></td>                                                                                                                                                                                                                | 5000 <td>6000 <td>8000 <td>10000 <td>20000</td> <td colspan="4"></td> </td></td></td>                                                                                                                                                                                                               | 6000 <td>8000 <td>10000 <td>20000</td> <td colspan="4"></td> </td></td>                                                                                                                                                                                                              | 8000 <td>10000 <td>20000</td> <td colspan="4"></td> </td>                                                                                                                                                                                                             | 10000 <td>20000</td> <td colspan="4"></td>                                                                                                                                                                                                             | 20000                                                                                                                                                                                                                                   |                                                                                                                                                                                                                          |                                                                                                                                                                                                           |                                                                                                                                                                                            |                                                                                                                                                                             |                                                                                                                                                              |                                                                                                                                               |                                                                                                                                |                                                                                                                 |                                                                                                  |                                                                                   |                                                                    |                                                     |                                      |                      |          |
|       | OD450    | 1.215274                                                                                                                                                                                                                                                                                                                          | 0.840434                                                                                                                                                                                                                                                                                                           | 0.538329                                                                                                                                                                                                                                                                                            | 0.45035                                                                                                                                                                                                                                                                              | 0.353983                                                                                                                                                                                                                                                              | 0.28828                                                                                                                                                                                                                                                | 0.154535                                                                                                                                                                                                                                |                                                                                                                                                                                                                          |                                                                                                                                                                                                           |                                                                                                                                                                                            |                                                                                                                                                                             |                                                                                                                                                              |                                                                                                                                               |                                                                                                                                |                                                                                                                 |                                                                                                  |                                                                                   |                                                                    |                                                     |                                      |                      |          |
| DAY57 | Time     | 3000 <td>5000 <td>7000 <td>10000 <td>15000 <td>20000 <td>30000 <td>40000 <td>50000 <td>60000 <td>80000 <td>100000</td> </td></td></td></td></td></td></td></td></td></td>                                                                                                                                                         | 5000 <td>7000 <td>10000 <td>15000 <td>20000 <td>30000 <td>40000 <td>50000 <td>60000 <td>80000 <td>100000</td> </td></td></td></td></td></td></td></td></td>                                                                                                                                                        | 7000 <td>10000 <td>15000 <td>20000 <td>30000 <td>40000 <td>50000 <td>60000 <td>80000 <td>100000</td> </td></td></td></td></td></td></td></td>                                                                                                                                                       | 10000 <td>15000 <td>20000 <td>30000 <td>40000 <td>50000 <td>60000 <td>80000 <td>100000</td> </td></td></td></td></td></td></td>                                                                                                                                                      | 15000 <td>20000 <td>30000 <td>40000 <td>50000 <td>60000 <td>80000 <td>100000</td> </td></td></td></td></td></td>                                                                                                                                                      | 20000 <td>30000 <td>40000 <td>50000 <td>60000 <td>80000 <td>100000</td> </td></td></td></td></td>                                                                                                                                                      | 30000 <td>40000 <td>50000 <td>60000 <td>80000 <td>100000</td> </td></td></td></td>                                                                                                                                                      | 40000 <td>50000 <td>60000 <td>80000 <td>100000</td> </td></td></td>                                                                                                                                                      | 50000 <td>60000 <td>80000 <td>100000</td> </td></td>                                                                                                                                                      | 60000 <td>80000 <td>100000</td> </td>                                                                                                                                                      | 80000 <td>100000</td>                                                                                                                                                       | 100000                                                                                                                                                       |                                                                                                                                               |                                                                                                                                |                                                                                                                 |                                                                                                  |                                                                                   |                                                                    |                                                     |                                      |                      |          |
|       | OD450    | 0.495383                                                                                                                                                                                                                                                                                                                          | 0.344959                                                                                                                                                                                                                                                                                                           | 0.271043                                                                                                                                                                                                                                                                                            | 0.262531                                                                                                                                                                                                                                                                             | 0.360728                                                                                                                                                                                                                                                              | 0.271816                                                                                                                                                                                                                                               | 0.204489                                                                                                                                                                                                                                | 0.152242                                                                                                                                                                                                                 | 0.121057                                                                                                                                                                                                  | 0.102146                                                                                                                                                                                   | 0.091589                                                                                                                                                                    | 0.075307                                                                                                                                                     |                                                                                                                                               |                                                                                                                                |                                                                                                                 |                                                                                                  |                                                                                   |                                                                    |                                                     |                                      |                      |          |
|       | SD       | 0.258456                                                                                                                                                                                                                                                                                                                          | 0.178225                                                                                                                                                                                                                                                                                                           | 0.129068                                                                                                                                                                                                                                                                                            | 0.095947                                                                                                                                                                                                                                                                             | 0.068154                                                                                                                                                                                                                                                              | 0.045023                                                                                                                                                                                                                                               | 0.03943                                                                                                                                                                                                                                 | 0.030603                                                                                                                                                                                                                 | 0.022688                                                                                                                                                                                                  | 0.024359                                                                                                                                                                                   | 0.016478                                                                                                                                                                    | 0.013673                                                                                                                                                     |                                                                                                                                               |                                                                                                                                |                                                                                                                 |                                                                                                  |                                                                                   |                                                                    |                                                     |                                      |                      |          |
|       |          |                                                                                                                                                                                                                                                                                                                                   |                                                                                                                                                                                                                                                                                                                    |                                                                                                                                                                                                                                                                                                     |                                                                                                                                                                                                                                                                                      |                                                                                                                                                                                                                                                                       |                                                                                                                                                                                                                                                        |                                                                                                                                                                                                                                         |                                                                                                                                                                                                                          |                                                                                                                                                                                                           |                                                                                                                                                                                            |                                                                                                                                                                             |                                                                                                                                                              |                                                                                                                                               |                                                                                                                                |                                                                                                                 |                                                                                                  |                                                                                   |                                                                    |                                                     |                                      |                      |          |
|       |          | MPV-EM6(M1R)                                                                                                                                                                                                                                                                                                                      |                                                                                                                                                                                                                                                                                                                    |                                                                                                                                                                                                                                                                                                     |                                                                                                                                                                                                                                                                                      |                                                                                                                                                                                                                                                                       |                                                                                                                                                                                                                                                        |                                                                                                                                                                                                                                         |                                                                                                                                                                                                                          |                                                                                                                                                                                                           |                                                                                                                                                                                            |                                                                                                                                                                             |                                                                                                                                                              |                                                                                                                                               |                                                                                                                                |                                                                                                                 |                                                                                                  |                                                                                   |                                                                    |                                                     |                                      |                      |          |
| Time  | Dilution | 100                                                                                                                                                                                                                                                                                                                               | 200                                                                                                                                                                                                                                                                                                                | 250                                                                                                                                                                                                                                                                                                 | 300                                                                                                                                                                                                                                                                                  | 500                                                                                                                                                                                                                                                                   |                                                                                                                                                                                                                                                        |                                                                                                                                                                                                                                         |                                                                                                                                                                                                                          |                                                                                                                                                                                                           |                                                                                                                                                                                            |                                                                                                                                                                             |                                                                                                                                                              |                                                                                                                                               |                                                                                                                                |                                                                                                                 |                                                                                                  |                                                                                   |                                                                    |                                                     |                                      |                      |          |
| DAY7  | OD450    | 0.43139                                                                                                                                                                                                                                                                                                                           | 0.20966                                                                                                                                                                                                                                                                                                            | 0.155442                                                                                                                                                                                                                                                                                            | 0.127759                                                                                                                                                                                                                                                                             | 0.056824                                                                                                                                                                                                                                                              |                                                                                                                                                                                                                                                        |                                                                                                                                                                                                                                         |                                                                                                                                                                                                                          |                                                                                                                                                                                                           |                                                                                                                                                                                            |                                                                                                                                                                             |                                                                                                                                                              |                                                                                                                                               |                                                                                                                                |                                                                                                                 |                                                                                                  |                                                                                   |                                                                    |                                                     |                                      |                      |          |
|       | SD       | 0.371489                                                                                                                                                                                                                                                                                                                          | 0.193108                                                                                                                                                                                                                                                                                                           | 0.147311                                                                                                                                                                                                                                                                                            | 0.119386                                                                                                                                                                                                                                                                             | 0.051332                                                                                                                                                                                                                                                              |                                                                                                                                                                                                                                                        |                                                                                                                                                                                                                                         |                                                                                                                                                                                                                          |                                                                                                                                                                                                           |                                                                                                                                                                                            |                                                                                                                                                                             |                                                                                                                                                              |                                                                                                                                               |                                                                                                                                |                                                                                                                 |                                                                                                  |                                                                                   |                                                                    |                                                     |                                      |                      |          |
| DAY14 | Time     | 200 <td>400 <td>500 <td>750 <td>1000 <td>1500 <td>2000 <td>3000 <td>4000 <td>5000</td> <td colspan="2"></td> </td></td></td></td></td></td></td></td>                                                                                                                                                                             | 400 <td>500 <td>750 <td>1000 <td>1500 <td>2000 <td>3000 <td>4000 <td>5000</td> <td colspan="2"></td> </td></td></td></td></td></td></td>                                                                                                                                                                           | 500 <td>750 <td>1000 <td>1500 <td>2000 <td>3000 <td>4000 <td>5000</td> <td colspan="2"></td> </td></td></td></td></td></td>                                                                                                                                                                         | 750 <td>1000 <td>1500 <td>2000 <td>3000 <td>4000 <td>5000</td> <td colspan="2"></td> </td></td></td></td></td>                                                                                                                                                                       | 1000 <td>1500 <td>2000 <td>3000 <td>4000 <td>5000</td> <td colspan="2"></td> </td></td></td></td>                                                                                                                                                                     | 1500 <td>2000 <td>3000 <td>4000 <td>5000</td> <td colspan="2"></td> </td></td></td>                                                                                                                                                                    | 2000 <td>3000 <td>4000 <td>5000</td> <td colspan="2"></td> </td></td>                                                                                                                                                                   | 3000 <td>4000 <td>5000</td> <td colspan="2"></td> </td>                                                                                                                                                                  | 4000 <td>5000</td> <td colspan="2"></td>                                                                                                                                                                  | 5000                                                                                                                                                                                       |                                                                                                                                                                             |                                                                                                                                                              |                                                                                                                                               |                                                                                                                                |                                                                                                                 |                                                                                                  |                                                                                   |                                                                    |                                                     |                                      |                      |          |
|       | OD450    | 1.070758                                                                                                                                                                                                                                                                                                                          | 1.097881                                                                                                                                                                                                                                                                                                           | 0.860396                                                                                                                                                                                                                                                                                            | 0.661866                                                                                                                                                                                                                                                                             | 0.506497                                                                                                                                                                                                                                                              | 0.383807                                                                                                                                                                                                                                               | 0.352514                                                                                                                                                                                                                                | 0.259299                                                                                                                                                                                                                 | 0.175427                                                                                                                                                                                                  | 0.189147                                                                                                                                                                                   |                                                                                                                                                                             |                                                                                                                                                              |                                                                                                                                               |                                                                                                                                |                                                                                                                 |                                                                                                  |                                                                                   |                                                                    |                                                     |                                      |                      |          |
| DAY28 | Time     | 10000 <td>10000 <td>20000 <td>25000 <td>30000 <td>35000 <td>40000 <td>45000 <td>50000 <td>100000</td> <td colspan="2"></td> </td></td></td></td></td></td></td></td>                                                                                                                                                              | 10000 <td>20000 <td>25000 <td>30000 <td>35000 <td>40000 <td>45000 <td>50000 <td>100000</td> <td colspan="2"></td> </td></td></td></td></td></td></td>                                                                                                                                                              | 20000 <td>25000 <td>30000 <td>35000 <td>40000 <td>45000 <td>50000 <td>100000</td> <td colspan="2"></td> </td></td></td></td></td></td>                                                                                                                                                              | 25000 <td>30000 <td>35000 <td>40000 <td>45000 <td>50000 <td>100000</td> <td colspan="2"></td> </td></td></td></td></td>                                                                                                                                                              | 30000 <td>35000 <td>40000 <td>45000 <td>50000 <td>100000</td> <td colspan="2"></td> </td></td></td></td>                                                                                                                                                              | 35000 <td>40000 <td>45000 <td>50000 <td>100000</td> <td colspan="2"></td> </td></td></td>                                                                                                                                                              | 40000 <td>45000 <td>50000 <td>100000</td> <td colspan="2"></td> </td></td>                                                                                                                                                              | 45000 <td>50000 <td>100000</td> <td colspan="2"></td> </td>                                                                                                                                                              | 50000 <td>100000</td> <td colspan="2"></td>                                                                                                                                                               | 100000                                                                                                                                                                                     |                                                                                                                                                                             |                                                                                                                                                              |                                                                                                                                               |                                                                                                                                |                                                                                                                 |                                                                                                  |                                                                                   |                                                                    |                                                     |                                      |                      |          |
|       | OD450    | 2.667173                                                                                                                                                                                                                                                                                                                          | 0.801644                                                                                                                                                                                                                                                                                                           | 0.541652                                                                                                                                                                                                                                                                                            | 0.324092                                                                                                                                                                                                                                                                             | 0.481092                                                                                                                                                                                                                                                              | 0.390781                                                                                                                                                                                                                                               | 0.439156                                                                                                                                                                                                                                | 0.376507                                                                                                                                                                                                                 | 0.363055                                                                                                                                                                                                  | 0.104331                                                                                                                                                                                   | 0.03384                                                                                                                                                                     |                                                                                                                                                              |                                                                                                                                               |                                                                                                                                |                                                                                                                 |                                                                                                  |                                                                                   |                                                                    |                                                     |                                      |                      |          |
| DAY43 | Time     | 10000 <td>20000 <td>25000 <td>30000 <td>35000 <td>40000 <td>50000 <td>60000 <td>70000 <td>80000 <td>100000</td> <td>1E+07</td> </td></td></td></td></td></td></td></td></td>                                                                                                                                                      | 20000 <td>25000 <td>30000 <td>35000 <td>40000 <td>50000 <td>60000 <td>70000 <td>80000 <td>100000</td> <td>1E+07</td> </td></td></td></td></td></td></td></td>                                                                                                                                                      | 25000 <td>30000 <td>35000 <td>40000 <td>50000 <td>60000 <td>70000 <td>80000 <td>100000</td> <td>1E+07</td> </td></td></td></td></td></td></td>                                                                                                                                                      | 30000 <td>35000 <td>40000 <td>50000 <td>60000 <td>70000 <td>80000 <td>100000</td> <td>1E+07</td> </td></td></td></td></td></td>                                                                                                                                                      | 35000 <td>40000 <td>50000 <td>60000 <td>70000 <td>80000 <td>100000</td> <td>1E+07</td> </td></td></td></td></td>                                                                                                                                                      | 40000 <td>50000 <td>60000 <td>70000 <td>80000 <td>100000</td> <td>1E+07</td> </td></td></td></td>                                                                                                                                                      | 50000 <td>60000 <td>70000 <td>80000 <td>100000</td> <td>1E+07</td> </td></td></td>                                                                                                                                                      | 60000 <td>70000 <td>80000 <td>100000</td> <td>1E+07</td> </td></td>                                                                                                                                                      | 70000 <td>80000 <td>100000</td> <td>1E+07</td> </td>                                                                                                                                                      | 80000 <td>100000</td> <td>1E+07</td>                                                                                                                                                       | 100000                                                                                                                                                                      | 1E+07                                                                                                                                                        |                                                                                                                                               |                                                                                                                                |                                                                                                                 |                                                                                                  |                                                                                   |                                                                    |                                                     |                                      |                      |          |
|       | OD450    | 1.618022                                                                                                                                                                                                                                                                                                                          | 1.44597                                                                                                                                                                                                                                                                                                            | 0.293184                                                                                                                                                                                                                                                                                            | 0.262968                                                                                                                                                                                                                                                                             | 0.175988                                                                                                                                                                                                                                                              | 0.160535                                                                                                                                                                                                                                               | 0.219887                                                                                                                                                                                                                                | 0.070764                                                                                                                                                                                                                 | 0.024003                                                                                                                                                                                                  | 0.014326                                                                                                                                                                                   | 0.032751                                                                                                                                                                    |                                                                                                                                                              |                                                                                                                                               |                                                                                                                                |                                                                                                                 |                                                                                                  |                                                                                   |                                                                    |                                                     |                                      |                      |          |
| DAY57 | Time     | 100000 <td>150000 <td>200000 <td>250000 <td>300000 <td>350000 <td>400000 <td>450000 <td>500000 <td>550000 <td>600000 <td>700000</td> </td></td></td></td></td></td></td></td></td></td>                                                                                                                                           | 150000 <td>200000 <td>250000 <td>300000 <td>350000 <td>400000 <td>450000 <td>500000 <td>550000 <td>600000 <td>700000</td> </td></td></td></td></td></td></td></td></td>                                                                                                                                            | 200000 <td>250000 <td>300000 <td>350000 <td>400000 <td>450000 <td>500000 <td>550000 <td>600000 <td>700000</td> </td></td></td></td></td></td></td></td>                                                                                                                                             | 250000 <td>300000 <td>350000 <td>400000 <td>450000 <td>500000 <td>550000 <td>600000 <td>700000</td> </td></td></td></td></td></td></td>                                                                                                                                              | 300000 <td>350000 <td>400000 <td>450000 <td>500000 <td>550000 <td>600000 <td>700000</td> </td></td></td></td></td></td>                                                                                                                                               | 350000 <td>400000 <td>450000 <td>500000 <td>550000 <td>600000 <td>700000</td> </td></td></td></td></td>                                                                                                                                                | 400000 <td>450000 <td>500000 <td>550000 <td>600000 <td>700000</td> </td></td></td></td>                                                                                                                                                 | 450000 <td>500000 <td>550000 <td>600000 <td>700000</td> </td></td></td>                                                                                                                                                  | 500000 <td>550000 <td>600000 <td>700000</td> </td></td>                                                                                                                                                   | 550000 <td>600000 <td>700000</td> </td>                                                                                                                                                    | 600000 <td>700000</td>                                                                                                                                                      | 700000                                                                                                                                                       |                                                                                                                                               |                                                                                                                                |                                                                                                                 |                                                                                                  |                                                                                   |                                                                    |                                                     |                                      |                      |          |
|       | OD450    | 0.502281                                                                                                                                                                                                                                                                                                                          | 0.348432                                                                                                                                                                                                                                                                                                           | 0.2463                                                                                                                                                                                                                                                                                              | 0.192969                                                                                                                                                                                                                                                                             | 0.164353                                                                                                                                                                                                                                                              | 0.133317                                                                                                                                                                                                                                               | 0.115925                                                                                                                                                                                                                                | 0.104983                                                                                                                                                                                                                 | 0.103929                                                                                                                                                                                                  | 0.087151                                                                                                                                                                                   | 0.087456                                                                                                                                                                    | 0.084609                                                                                                                                                     |                                                                                                                                               |                                                                                                                                |                                                                                                                 |                                                                                                  |                                                                                   |                                                                    |                                                     |                                      |                      |          |
|       | SD       | 0.322604                                                                                                                                                                                                                                                                                                                          | 0.226567                                                                                                                                                                                                                                                                                                           | 0.166993                                                                                                                                                                                                                                                                                            | 0.135405                                                                                                                                                                                                                                                                             | 0.115434                                                                                                                                                                                                                                                              | 0.099551                                                                                                                                                                                                                                               | 0.089728                                                                                                                                                                                                                                | 0.083325                                                                                                                                                                                                                 | 0.071983                                                                                                                                                                                                  | 0.065062                                                                                                                                                                                   | 0.062168                                                                                                                                                                    | 0.054439                                                                                                                                                     |                                                                                                                                               |                                                                                                                                |                                                                                                                 |                                                                                                  |                                                                                   |                                                                    |                                                     |                                      |                      |          |
|       |          |                                                                                                                                                                                                                                                                                                                                   |                                                                                                                                                                                                                                                                                                                    |                                                                                                                                                                                                                                                                                                     |                                                                                                                                                                                                                                                                                      |                                                                                                                                                                                                                                                                       |                                                                                                                                                                                                                                                        |                                                                                                                                                                                                                                         |                                                                                                                                                                                                                          |                                                                                                                                                                                                           |                                                                                                                                                                                            |                                                                                                                                                                             |                                                                                                                                                              |                                                                                                                                               |                                                                                                                                |                                                                                                                 |                                                                                                  |                                                                                   |                                                                    |                                                     |                                      |                      |          |
|       |          | MPV-EM6(E8L)                                                                                                                                                                                                                                                                                                                      |                                                                                                                                                                                                                                                                                                                    |                                                                                                                                                                                                                                                                                                     |                                                                                                                                                                                                                                                                                      |                                                                                                                                                                                                                                                                       |                                                                                                                                                                                                                                                        |                                                                                                                                                                                                                                         |                                                                                                                                                                                                                          |                                                                                                                                                                                                           |                                                                                                                                                                                            |                                                                                                                                                                             |                                                                                                                                                              |                                                                                                                                               |                                                                                                                                |                                                                                                                 |                                                                                                  |                                                                                   |                                                                    |                                                     |                                      |                      |          |
| Time  | Dilution | 100                                                                                                                                                                                                                                                                                                                               | 200                                                                                                                                                                                                                                                                                                                | 300                                                                                                                                                                                                                                                                                                 | 400                                                                                                                                                                                                                                                                                  | 500                                                                                                                                                                                                                                                                   | 750                                                                                                                                                                                                                                                    | 1000                                                                                                                                                                                                                                    | 2000                                                                                                                                                                                                                     |                                                                                                                                                                                                           |                                                                                                                                                                                            |                                                                                                                                                                             |                                                                                                                                                              |                                                                                                                                               |                                                                                                                                |                                                                                                                 |                                                                                                  |                                                                                   |                                                                    |                                                     |                                      |                      |          |
| DAY7  | OD450    | 0.913383                                                                                                                                                                                                                                                                                                                          | 0.439963                                                                                                                                                                                                                                                                                                           | 0.307886                                                                                                                                                                                                                                                                                            | 0.209154                                                                                                                                                                                                                                                                             | 0.166577                                                                                                                                                                                                                                                              | 0.108716                                                                                                                                                                                                                                               | 0.072256                                                                                                                                                                                                                                | 0.04045                                                                                                                                                                                                                  |                                                                                                                                                                                                           |                                                                                                                                                                                            |                                                                                                                                                                             |                                                                                                                                                              |                                                                                                                                               |                                                                                                                                |                                                                                                                 |                                                                                                  |                                                                                   |                                                                    |                                                     |                                      |                      |          |
|       | SD       | 0.547544                                                                                                                                                                                                                                                                                                                          | 0.26494                                                                                                                                                                                                                                                                                                            | 0.197472                                                                                                                                                                                                                                                                                            | 0.124774                                                                                                                                                                                                                                                                             | 0.101744                                                                                                                                                                                                                                                              | 0.071114                                                                                                                                                                                                                                               | 0.049621                                                                                                                                                                                                                                | 0.028687                                                                                                                                                                                                                 |                                                                                                                                                                                                           |                                                                                                                                                                                            |                                                                                                                                                                             |                                                                                                                                                              |                                                                                                                                               |                                                                                                                                |                                                                                                                 |                                                                                                  |                                                                                   |                                                                    |                                                     |                                      |                      |          |
| DAY14 | Time     | 100 <td>200 <td>500 <td>750 <td>1000 <td>2000 <td>3000 <td>4000 <td>5000 <td>7500</td> <td colspan="2"></td> </td></td></td></td></td></td></td></td>                                                                                                                                                                             | 200 <td>500 <td>750 <td>1000 <td>2000 <td>3000 <td>4000 <td>5000 <td>7500</td> <td colspan="2"></td> </td></td></td></td></td></td></td>                                                                                                                                                                           | 500 <td>750 <td>1000 <td>2000 <td>3000 <td>4000 <td>5000 <td>7500</td> <td colspan="2"></td> </td></td></td></td></td></td>                                                                                                                                                                         | 750 <td>1000 <td>2000 <td>3000 <td>4000 <td>5000 <td>7500</td> <td colspan="2"></td> </td></td></td></td></td>                                                                                                                                                                       | 1000 <td>2000 <td>3000 <td>4000 <td>5000 <td>7500</td> <td colspan="2"></td> </td></td></td></td>                                                                                                                                                                     | 2000 <td>3000 <td>4000 <td>5000 <td>7500</td> <td colspan="2"></td> </td></td></td>                                                                                                                                                                    | 3000 <td>4000 <td>5000 <td>7500</td> <td colspan="2"></td> </td></td>                                                                                                                                                                   | 4000 <td>5000 <td>7500</td> <td colspan="2"></td> </td>                                                                                                                                                                  | 5000 <td>7500</td> <td colspan="2"></td>                                                                                                                                                                  | 7500                                                                                                                                                                                       |                                                                                                                                                                             |                                                                                                                                                              |                                                                                                                                               |                                                                                                                                |                                                                                                                 |                                                                                                  |                                                                                   |                                                                    |                                                     |                                      |                      |          |
|       | OD450    | 2.956318                                                                                                                                                                                                                                                                                                                          | 2.682934                                                                                                                                                                                                                                                                                                           | 1.774209                                                                                                                                                                                                                                                                                            | 1.318089                                                                                                                                                                                                                                                                             | 1.093587                                                                                                                                                                                                                                                              | 0.603117                                                                                                                                                                                                                                               | 0.434457                                                                                                                                                                                                                                | 0.326603                                                                                                                                                                                                                 | 0.250047                                                                                                                                                                                                  | 0.177                                                                                                                                                                                      |                                                                                                                                                                             |                                                                                                                                                              |                                                                                                                                               |                                                                                                                                |                                                                                                                 |                                                                                                  |                                                                                   |                                                                    |                                                     |                                      |                      |          |
| DAY28 | Time     | 10000 <td>20000 <td>22000 <td>25000 <td>28000 <td>30000 <td>32000 <td>35000 <td>45000 <td>50000</td> <td>52000 <td>54000 <td>56000 <td>58000 <td>60000 <td>65000 <td>68000 <td>70000 <td>80000 <td>90000</td> </td></td></td></td></td></td></td></td></td></td></td></td></td></td></td></td></td>                               | 20000 <td>22000 <td>25000 <td>28000 <td>30000 <td>32000 <td>35000 <td>45000 <td>50000</td> <td>52000 <td>54000 <td>56000 <td>58000 <td>60000 <td>65000 <td>68000 <td>70000 <td>80000 <td>90000</td> </td></td></td></td></td></td></td></td></td></td></td></td></td></td></td></td>                               | 22000 <td>25000 <td>28000 <td>30000 <td>32000 <td>35000 <td>45000 <td>50000</td> <td>52000 <td>54000 <td>56000 <td>58000 <td>60000 <td>65000 <td>68000 <td>70000 <td>80000 <td>90000</td> </td></td></td></td></td></td></td></td></td></td></td></td></td></td></td>                               | 25000 <td>28000 <td>30000 <td>32000 <td>35000 <td>45000 <td>50000</td> <td>52000 <td>54000 <td>56000 <td>58000 <td>60000 <td>65000 <td>68000 <td>70000 <td>80000 <td>90000</td> </td></td></td></td></td></td></td></td></td></td></td></td></td></td>                               | 28000 <td>30000 <td>32000 <td>35000 <td>45000 <td>50000</td> <td>52000 <td>54000 <td>56000 <td>58000 <td>60000 <td>65000 <td>68000 <td>70000 <td>80000 <td>90000</td> </td></td></td></td></td></td></td></td></td></td></td></td></td>                               | 30000 <td>32000 <td>35000 <td>45000 <td>50000</td> <td>52000 <td>54000 <td>56000 <td>58000 <td>60000 <td>65000 <td>68000 <td>70000 <td>80000 <td>90000</td> </td></td></td></td></td></td></td></td></td></td></td></td>                               | 32000 <td>35000 <td>45000 <td>50000</td> <td>52000 <td>54000 <td>56000 <td>58000 <td>60000 <td>65000 <td>68000 <td>70000 <td>80000 <td>90000</td> </td></td></td></td></td></td></td></td></td></td></td>                               | 35000 <td>45000 <td>50000</td> <td>52000 <td>54000 <td>56000 <td>58000 <td>60000 <td>65000 <td>68000 <td>70000 <td>80000 <td>90000</td> </td></td></td></td></td></td></td></td></td></td>                               | 45000 <td>50000</td> <td>52000 <td>54000 <td>56000 <td>58000 <td>60000 <td>65000 <td>68000 <td>70000 <td>80000 <td>90000</td> </td></td></td></td></td></td></td></td></td>                               | 50000                                                                                                                                                                                      | 52000 <td>54000 <td>56000 <td>58000 <td>60000 <td>65000 <td>68000 <td>70000 <td>80000 <td>90000</td> </td></td></td></td></td></td></td></td>                               | 54000 <td>56000 <td>58000 <td>60000 <td>65000 <td>68000 <td>70000 <td>80000 <td>90000</td> </td></td></td></td></td></td></td>                               | 56000 <td>58000 <td>60000 <td>65000 <td>68000 <td>70000 <td>80000 <td>90000</td> </td></td></td></td></td></td>                               | 58000 <td>60000 <td>65000 <td>68000 <td>70000 <td>80000 <td>90000</td> </td></td></td></td></td>                               | 60000 <td>65000 <td>68000 <td>70000 <td>80000 <td>90000</td> </td></td></td></td>                               | 65000 <td>68000 <td>70000 <td>80000 <td>90000</td> </td></td></td>                               | 68000 <td>70000 <td>80000 <td>90000</td> </td></td>                               | 70000 <td>80000 <td>90000</td> </td>                               | 80000 <td>90000</td>                                | 90000                                |                      |          |
|       | OD450    | 0.535654                                                                                                                                                                                                                                                                                                                          | 0.647053                                                                                                                                                                                                                                                                                                           | 0.588435                                                                                                                                                                                                                                                                                            | 0.479619                                                                                                                                                                                                                                                                             | 0.409284                                                                                                                                                                                                                                                              | 0.258435                                                                                                                                                                                                                                               | 0.175051                                                                                                                                                                                                                                | 0.125124                                                                                                                                                                                                                 | 0.103834                                                                                                                                                                                                  | 0.074222                                                                                                                                                                                   |                                                                                                                                                                             |                                                                                                                                                              |                                                                                                                                               |                                                                                                                                |                                                                                                                 |                                                                                                  |                                                                                   |                                                                    |                                                     |                                      |                      |          |
| DAY43 | Time     | 20000 <td>22000 <td>25000 <td>28000 <td>30000 <td>32000 <td>35000 <td>40000 <td>45000 <td>50000 <td>51000 <td>53000 <td>55000 <td>58000 <td>60000 <td>62000 <td>65000 <td>68000 <td>70000 <td>75000 <td>80000 <td>90000</td> </td></td></td></td></td></td></td></td></td></td></td></td></td></td></td></td></td></td></td></td> | 22000 <td>25000 <td>28000 <td>30000 <td>32000 <td>35000 <td>40000 <td>45000 <td>50000 <td>51000 <td>53000 <td>55000 <td>58000 <td>60000 <td>62000 <td>65000 <td>68000 <td>70000 <td>75000 <td>80000 <td>90000</td> </td></td></td></td></td></td></td></td></td></td></td></td></td></td></td></td></td></td></td> | 25000 <td>28000 <td>30000 <td>32000 <td>35000 <td>40000 <td>45000 <td>50000 <td>51000 <td>53000 <td>55000 <td>58000 <td>60000 <td>62000 <td>65000 <td>68000 <td>70000 <td>75000 <td>80000 <td>90000</td> </td></td></td></td></td></td></td></td></td></td></td></td></td></td></td></td></td></td> | 28000 <td>30000 <td>32000 <td>35000 <td>40000 <td>45000 <td>50000 <td>51000 <td>53000 <td>55000 <td>58000 <td>60000 <td>62000 <td>65000 <td>68000 <td>70000 <td>75000 <td>80000 <td>90000</td> </td></td></td></td></td></td></td></td></td></td></td></td></td></td></td></td></td> | 30000 <td>32000 <td>35000 <td>40000 <td>45000 <td>50000 <td>51000 <td>53000 <td>55000 <td>58000 <td>60000 <td>62000 <td>65000 <td>68000 <td>70000 <td>75000 <td>80000 <td>90000</td> </td></td></td></td></td></td></td></td></td></td></td></td></td></td></td></td> | 32000 <td>35000 <td>40000 <td>45000 <td>50000 <td>51000 <td>53000 <td>55000 <td>58000 <td>60000 <td>62000 <td>65000 <td>68000 <td>70000 <td>75000 <td>80000 <td>90000</td> </td></td></td></td></td></td></td></td></td></td></td></td></td></td></td> | 35000 <td>40000 <td>45000 <td>50000 <td>51000 <td>53000 <td>55000 <td>58000 <td>60000 <td>62000 <td>65000 <td>68000 <td>70000 <td>75000 <td>80000 <td>90000</td> </td></td></td></td></td></td></td></td></td></td></td></td></td></td> | 40000 <td>45000 <td>50000 <td>51000 <td>53000 <td>55000 <td>58000 <td>60000 <td>62000 <td>65000 <td>68000 <td>70000 <td>75000 <td>80000 <td>90000</td> </td></td></td></td></td></td></td></td></td></td></td></td></td> | 45000 <td>50000 <td>51000 <td>53000 <td>55000 <td>58000 <td>60000 <td>62000 <td>65000 <td>68000 <td>70000 <td>75000 <td>80000 <td>90000</td> </td></td></td></td></td></td></td></td></td></td></td></td> | 50000 <td>51000 <td>53000 <td>55000 <td>58000 <td>60000 <td>62000 <td>65000 <td>68000 <td>70000 <td>75000 <td>80000 <td>90000</td> </td></td></td></td></td></td></td></td></td></td></td> | 51000 <td>53000 <td>55000 <td>58000 <td>60000 <td>62000 <td>65000 <td>68000 <td>70000 <td>75000 <td>80000 <td>90000</td> </td></td></td></td></td></td></td></td></td></td> | 53000 <td>55000 <td>58000 <td>60000 <td>62000 <td>65000 <td>68000 <td>70000 <td>75000 <td>80000 <td>90000</td> </td></td></td></td></td></td></td></td></td> | 55000 <td>58000 <td>60000 <td>62000 <td>65000 <td>68000 <td>70000 <td>75000 <td>80000 <td>90000</td> </td></td></td></td></td></td></td></td> | 58000 <td>60000 <td>62000 <td>65000 <td>68000 <td>70000 <td>75000 <td>80000 <td>90000</td> </td></td></td></td></td></td></td> | 60000 <td>62000 <td>65000 <td>68000 <td>70000 <td>75000 <td>80000 <td>90000</td> </td></td></td></td></td></td> | 62000 <td>65000 <td>68000 <td>70000 <td>75000 <td>80000 <td>90000</td> </td></td></td></td></td> | 65000 <td>68000 <td>70000 <td>75000 <td>80000 <td>90000</td> </td></td></td></td> | 68000 <td>70000 <td>75000 <td>80000 <td>90000</td> </td></td></td> | 70000 <td>75000 <td>80000 <td>90000</td> </td></td> | 75000 <td>80000 <td>90000</td> </td> | 80000 <td>90000</td> | 90000    |
|       | OD450    | 1.144886                                                                                                                                                                                                                                                                                                                          | 0.965056                                                                                                                                                                                                                                                                                                           | 0.840305                                                                                                                                                                                                                                                                                            | 0.781695                                                                                                                                                                                                                                                                             | 0.713433                                                                                                                                                                                                                                                              | 0.662556                                                                                                                                                                                                                                               | 0.617246                                                                                                                                                                                                                                | 0.578025                                                                                                                                                                                                                 | 0.509391                                                                                                                                                                                                  | 0.527379                                                                                                                                                                                   | 0.25979                                                                                                                                                                     | 0.234865                                                                                                                                                     | 0.234046                                                                                                                                      | 0.215284                                                                                                                       | 0.213651                                                                                                        | 0.214655                                                                                         | 0.203872                                                                          | 0.194665                                                           | 0.190981                                            | 0.188248                             | 0.173201             | 0.172688 |
| DAY57 | Time     | 100000 <td>150000 <td>200000 <td>250000 <td>300000 <td>350000 <td>400000 <td>450000 <td>500000 <td>550000 <td>600000 <td>700000</td> </td></td></td></td></td></td></td></td></td></td>                                                                                                                                           | 150000 <td>200000 <td>250000 <td>300000 <td>350000 <td>400000 <td>450000 <td>500000 <td>550000 <td>600000 <td>700000</td> </td></td></td></td></td></td></td></td></td>                                                                                                                                            | 200000 <td>250000 <td>300000 <td>350000 <td>400000 <td>450000 <td>500000 <td>550000 <td>600000 <td>700000</td> </td></td></td></td></td></td></td></td>                                                                                                                                             | 250000 <td>300000 <td>350000 <td>400000 <td>450000 <td>500000 <td>550000 <td>600000 <td>700000</td> </td></td></td></td></td></td></td>                                                                                                                                              | 300000 <td>350000 <td>400000 <td>450000 <td>500000 <td>550000 <td>600000 <td>700000</td> </td></td></td></td></td></td>                                                                                                                                               | 350000 <td>400000 <td>450000 <td>500000 <td>550000 <td>600000 <td>700000</td> </td></td></td></td></td>                                                                                                                                                | 400000 <td>450000 <td>500000 <td>550000 <td>600000 <td>700000</td> </td></td></td></td>                                                                                                                                                 | 450000 <td>500000 <td>550000 <td>600000 <td>700000</td> </td></td></td>                                                                                                                                                  | 500000 <td>550000 <td>600000 <td>700000</td> </td></td>                                                                                                                                                   | 550000 <td>600000 <td>700000</td> </td>                                                                                                                                                    | 600000 <td>700000</td>                                                                                                                                                      | 700000                                                                                                                                                       |                                                                                                                                               |                                                                                                                                |                                                                                                                 |                                                                                                  |                                                                                   |                                                                    |                                                     |                                      |                      |          |
|       | OD450    | 0.229103                                                                                                                                                                                                                                                                                                                          | 0.197956                                                                                                                                                                                                                                                                                                           | 0.17006                                                                                                                                                                                                                                                                                             | 0.146402                                                                                                                                                                                                                                                                             | 0.142577                                                                                                                                                                                                                                                              | 0.140014                                                                                                                                                                                                                                               | 0.127277                                                                                                                                                                                                                                | 0.130818                                                                                                                                                                                                                 | 0.144714                                                                                                                                                                                                  | 0.109711                                                                                                                                                                                   | 0.070689                                                                                                                                                                    | 0.051882                                                                                                                                                     | 0.042471                                                                                                                                      | 0.037012                                                                                                                       | 0.03387                                                                                                         | 0.042027                                                                                         | 0.035517                                                                          | 0.032154                                                           | 0.038296                                            | 0.036725                             | 0.032884             | 0.032148 |
|       | SD       | 0.094766                                                                                                                                                                                                                                                                                                                          | 0.0739084                                                                                                                                                                                                                                                                                                          | 0.675705                                                                                                                                                                                                                                                                                            | 0.593716                                                                                                                                                                                                                                                                             | 0.551464                                                                                                                                                                                                                                                              | 0.502695                                                                                                                                                                                                                                               | 0.473387                                                                                                                                                                                                                                | 0.422055                                                                                                                                                                                                                 | 0.422939                                                                                                                                                                                                  | 0.386454                                                                                                                                                                                   | 0.181288                                                                                                                                                                    | 0.08303                                                                                                                                                      |                                                                                                                                               |                                                                                                                                |                                                                                                                 |                                                                                                  |                                                                                   |                                                                    |                                                     |                                      |                      |          |
|       |          |                                                                                                                                                                                                                                                                                                                                   |                                                                                                                                                                                                                                                                                                                    |                                                                                                                                                                                                                                                                                                     |                                                                                                                                                                                                                                                                                      |                                                                                                                                                                                                                                                                       |                                                                                                                                                                                                                                                        |                                                                                                                                                                                                                                         |                                                                                                                                                                                                                          |                                                                                                                                                                                                           |                                                                                                                                                                                            |                                                                                                                                                                             |                                                                                                                                                              |                                                                                                                                               |                                                                                                                                |                                                                                                                 |                                                                                                  |                                                                                   |                                                                    |                                                     |                                      |                      |          |
|       |          | MPV-EM6(A29L)                                                                                                                                                                                                                                                                                                                     |                                                                                                                                                                                                                                                                                                                    |                                                                                                                                                                                                                                                                                                     |                                                                                                                                                                                                                                                                                      |                                                                                                                                                                                                                                                                       |                                                                                                                                                                                                                                                        |                                                                                                                                                                                                                                         |                                                                                                                                                                                                                          |                                                                                                                                                                                                           |                                                                                                                                                                                            |                                                                                                                                                                             |                                                                                                                                                              |                                                                                                                                               |                                                                                                                                |                                                                                                                 |                                                                                                  |                                                                                   |                                                                    |                                                     |                                      |                      |          |
| Time  | Dilution | 100                                                                                                                                                                                                                                                                                                                               | 190                                                                                                                                                                                                                                                                                                                | 200                                                                                                                                                                                                                                                                                                 | 250                                                                                                                                                                                                                                                                                  | 300                                                                                                                                                                                                                                                                   | 500                                                                                                                                                                                                                                                    |                                                                                                                                                                                                                                         |                                                                                                                                                                                                                          |                                                                                                                                                                                                           |                                                                                                                                                                                            |                                                                                                                                                                             |                                                                                                                                                              |                                                                                                                                               |                                                                                                                                |                                                                                                                 |                                                                                                  |                                                                                   |                                                                    |                                                     |                                      |                      |          |
| DAY7  | OD450    | 0.257807                                                                                                                                                                                                                                                                                                                          | 0.10148                                                                                                                                                                                                                                                                                                            | 0.113981                                                                                                                                                                                                                                                                                            | 0.103576                                                                                                                                                                                                                                                                             | 0.089478                                                                                                                                                                                                                                                              | 0.049437                                                                                                                                                                                                                                               |                                                                                                                                                                                                                                         |                                                                                                                                                                                                                          |                                                                                                                                                                                                           |                                                                                                                                                                                            |                                                                                                                                                                             |                                                                                                                                                              |                                                                                                                                               |                                                                                                                                |                                                                                                                 |                                                                                                  |                                                                                   |                                                                    |                                                     |                                      |                      |          |
|       | SD       | 0.094807                                                                                                                                                                                                                                                                                                                          | 0.050688                                                                                                                                                                                                                                                                                                           | 0.055088                                                                                                                                                                                                                                                                                            | 0.045865                                                                                                                                                                                                                                                                             | 0.035126                                                                                                                                                                                                                                                              | 0.023378                                                                                                                                                                                                                                               |                                                                                                                                                                                                                                         |                                                                                                                                                                                                                          |                                                                                                                                                                                                           |                                                                                                                                                                                            |                                                                                                                                                                             |                                                                                                                                                              |                                                                                                                                               |                                                                                                                                |                                                                                                                 |                                                                                                  |                                                                                   |                                                                    |                                                     |                                      |                      |          |
| DAY14 | Time     | 100 <td>150 <td>200 <td>250 <td>300 <td>500</td> <td colspan="5"></td> </td></td></td></td>                                                                                                                                                                                                                                       | 150 <td>200 <td>250 <td>300 <td>500</td> <td colspan="5"></td> </td></td></td>                                                                                                                                                                                                                                     | 200 <td>250 <td>300 <td>500</td> <td colspan="5"></td> </td></td>                                                                                                                                                                                                                                   | 250 <td>300 <td>500</td> <td colspan="5"></td> </td>                                                                                                                                                                                                                                 | 300 <td>500</td> <td colspan="5"></td>                                                                                                                                                                                                                                | 500                                                                                                                                                                                                                                                    |                                                                                                                                                                                                                                         |                                                                                                                                                                                                                          |                                                                                                                                                                                                           |                                                                                                                                                                                            |                                                                                                                                                                             |                                                                                                                                                              |                                                                                                                                               |                                                                                                                                |                                                                                                                 |                                                                                                  |                                                                                   |                                                                    |                                                     |                                      |                      |          |
|       | OD450    | 0.267511                                                                                                                                                                                                                                                                                                                          | 0.182802                                                                                                                                                                                                                                                                                                           | 0.199794                                                                                                                                                                                                                                                                                            | 0.184837                                                                                                                                                                                                                                                                             | 0.086805                                                                                                                                                                                                                                                              | 0.043537                                                                                                                                                                                                                                               |                                                                                                                                                                                                                                         |                                                                                                                                                                                                                          |                                                                                                                                                                                                           |                                                                                                                                                                                            |                                                                                                                                                                             |                                                                                                                                                              |                                                                                                                                               |                                                                                                                                |                                                                                                                 |                                                                                                  |                                                                                   |                                                                    |                                                     |                                      |                      |          |
| DAY28 | Time     | 1000 <td>1500 <td>2000 <td>2500 <td>3000 <td>4000 <td>5000</td> <td colspan="4"></td> </td></td></td></td></td>                                                                                                                                                                                                                   | 1500 <td>2000 <td>2500 <td>3000 <td>4000 <td>5000</td> <td colspan="4"></td> </td></td></td></td>                                                                                                                                                                                                                  | 2000 <td>2500 <td>3000 <td>4000 <td>5000</td> <td colspan="4"></td> </td></td></td>                                                                                                                                                                                                                 | 2500 <td>3000 <td>4000 <td>5000</td> <td colspan="4"></td> </td></td>                                                                                                                                                                                                                | 3000 <td>4000 <td>5000</td> <td colspan="4"></td> </td>                                                                                                                                                                                                               | 4000 <td>5000</td> <td colspan="4"></td>                                                                                                                                                                                                               | 5000                                                                                                                                                                                                                                    |                                                                                                                                                                                                                          |                                                                                                                                                                                                           |                                                                                                                                                                                            |                                                                                                                                                                             |                                                                                                                                                              |                                                                                                                                               |                                                                                                                                |                                                                                                                 |                                                                                                  |                                                                                   |                                                                    |                                                     |                                      |                      |          |
|       | OD450    | 0.864285                                                                                                                                                                                                                                                                                                                          | 0.597387                                                                                                                                                                                                                                                                                                           | 0.53467                                                                                                                                                                                                                                                                                             | 0.39113                                                                                                                                                                                                                                                                              | 0.334869                                                                                                                                                                                                                                                              | 0.269888                                                                                                                                                                                                                                               | 0.239425                                                                                                                                                                                                                                |                                                                                                                                                                                                                          |                                                                                                                                                                                                           |                                                                                                                                                                                            |                                                                                                                                                                             |                                                                                                                                                              |                                                                                                                                               |                                                                                                                                |                                                                                                                 |                                                                                                  |                                                                                   |                                                                    |                                                     |                                      |                      |          |
| DAY43 | Time     | 200 <td>300 <td>400 <td>500 <td>600 <td>700 <td>800 <td>900 <td>1000</td> <td colspan="2"></td> </td></td></td></td></td></td></td>                                                                                                                                                                                               | 300 <td>400 <td>500 <td>600 <td>700 <td>800 <td>900 <td>1000</td> <td colspan="2"></td> </td></td></td></td></td></td>                                                                                                                                                                                             | 400 <td>500 <td>600 <td>700 <td>800 <td>900 <td>1000</td> <td colspan="2"></td> </td></td></td></td></td>                                                                                                                                                                                           | 500 <td>600 <td>700 <td>800 <td>900 <td>1000</td> <td colspan="2"></td> </td></td></td></td>                                                                                                                                                                                         | 600 <td>700 <td>800 <td>900 <td>1000</td> <td colspan="2"></td> </td></td></td>                                                                                                                                                                                       | 700 <td>800 <td>900 <td>1000</td> <td colspan="2"></td> </td></td>                                                                                                                                                                                     | 800 <td>900 <td>1000</td> <td colspan="2"></td> </td>                                                                                                                                                                                   | 900 <td>1000</td> <td colspan="2"></td>                                                                                                                                                                                  | 1000                                                                                                                                                                                                      |                                                                                                                                                                                            |                                                                                                                                                                             |                                                                                                                                                              |                                                                                                                                               |                                                                                                                                |                                                                                                                 |                                                                                                  |                                                                                   |                                                                    |                                                     |                                      |                      |          |
|       | OD450    | 0.540348                                                                                                                                                                                                                                                                                                                          | 0.358865                                                                                                                                                                                                                                                                                                           | 0.289794                                                                                                                                                                                                                                                                                            | 0.279346                                                                                                                                                                                                                                                                             | 0.205341                                                                                                                                                                                                                                                              | 0.093388                                                                                                                                                                                                                                               | 0.171534                                                                                                                                                                                                                                | 0.14903                                                                                                                                                                                                                  | 0.134417                                                                                                                                                                                                  |                                                                                                                                                                                            |                                                                                                                                                                             |                                                                                                                                                              |                                                                                                                                               |                                                                                                                                |                                                                                                                 |                                                                                                  |                                                                                   |                                                                    |                                                     |                                      |                      |          |
| DAY57 | Time     | 200 <td>300 <td>400 <td>500 <td>750 <td>1000 <td>2000 <td>3000 <td>4000 <td>5000 <td>7000 <td>10000</td> </td></td></td></td></td></td></td></td></td></td>                                                                                                                                                                       | 300 <td>400 <td>500 <td>750 <td>1000 <td>2000 <td>3000 <td>4000 <td>5000 <td>7000 <td>10000</td> </td></td></td></td></td></td></td></td></td>                                                                                                                                                                     | 400 <td>500 <td>750 <td>1000 <td>2000 <td>3000 <td>4000 <td>5000 <td>7000 <td>10000</td> </td></td></td></td></td></td></td></td>                                                                                                                                                                   | 500 <td>750 <td>1000 <td>2000 <td>3000 <td>4000 <td>5000 <td>7000 <td>10000</td> </td></td></td></td></td></td></td>                                                                                                                                                                 | 750 <td>1000 <td>2000 <td>3000 <td>4000 <td>5000 <td>7000 <td>10000</td> </td></td></td></td></td></td>                                                                                                                                                               | 1000 <td>2000 <td>3000 <td>4000 <td>5000 <td>7000 <td>10000</td> </td></td></td></td></td>                                                                                                                                                             | 2000 <td>3000 <td>4000 <td>5000 <td>7000 <td>10000</td> </td></td></td></td>                                                                                                                                                            | 3000 <td>4000 <td>5000 <td>7000 <td>10000</td> </td></td></td>                                                                                                                                                           | 4000 <td>5000 <td>7000 <td>10000</td> </td></td>                                                                                                                                                          | 5000 <td>7000 <td>10000</td> </td>                                                                                                                                                         | 7000 <td>10000</td>                                                                                                                                                         | 10000                                                                                                                                                        |                                                                                                                                               |                                                                                                                                |                                                                                                                 |                                                                                                  |                                                                                   |                                                                    |                                                     |                                      |                      |          |
|       | OD450    | 1.862947                                                                                                                                                                                                                                                                                                                          | 1.49716                                                                                                                                                                                                                                                                                                            | 1.229723                                                                                                                                                                                                                                                                                            | 1.04692                                                                                                                                                                                                                                                                              | 0.711778                                                                                                                                                                                                                                                              | 0.63283                                                                                                                                                                                                                                                | 0.2989                                                                                                                                                                                                                                  | 0.200196                                                                                                                                                                                                                 | 0.166518                                                                                                                                                                                                  | 0.126189                                                                                                                                                                                   | 0.097663                                                                                                                                                                    | 0.08286                                                                                                                                                      |                                                                                                                                               |                                                                                                                                |                                                                                                                 |                                                                                                  |                                                                                   |                                                                    |                                                     |                                      |                      |          |
|       | SD       | 1.967111                                                                                                                                                                                                                                                                                                                          | 1.651998                                                                                                                                                                                                                                                                                                           | 1.448274                                                                                                                                                                                                                                                                                            | 1.297174                                                                                                                                                                                                                                                                             | 0.880076                                                                                                                                                                                                                                                              | 0.703032                                                                                                                                                                                                                                               | 0.334509                                                                                                                                                                                                                                | 0.256614                                                                                                                                                                                                                 | 0.171795                                                                                                                                                                                                  | 0.119089                                                                                                                                                                                   | 0.087649                                                                                                                                                                    | 0.066534                                                                                                                                                     |                                                                                                                                               |                                                                                                                                |                                                                                                                 |                                                                                                  |                                                                                   |                                                                    |                                                     |                                      |                      |          |
|       |          |                                                                                                                                                                                                                                                                                                                                   |                                                                                                                                                                                                                                                                                                                    |                                                                                                                                                                                                                                                                                                     |                                                                                                                                                                                                                                                                                      |                                                                                                                                                                                                                                                                       |                                                                                                                                                                                                                                                        |                                                                                                                                                                                                                                         |                                                                                                                                                                                                                          |                                                                                                                                                                                                           |                                                                                                                                                                                            |                                                                                                                                                                             |                                                                                                                                                              |                                                                                                                                               |                                                                                                                                |                                                                                                                 |                                                                                                  |                                                                                   |                                                                    |                                                     |                                      |                      |          |

\*SD Standard Deviation
