# Supplementary material
Source: PubMed Central journal article supplement (PMC10257374)
Supplement: 11427_2023_2378_MOESM4_ESM.pdf [file 11427_2023_2378_MOESM4_ESM.pdf]

table S3 NT<sub>50</sub> titers against VACV (strain Tian Tan) in sera of vaccinated BALB/c mice on day57.

| Mice No. | Vac-Ctrl (n=7) | MPV-E2 (n=7) | MPV-M2 (n=7) | MPV-M4 (n=6) | MPV-EM6 (n=6) |
|----------|----------------|--------------|--------------|--------------|---------------|
| 1        | <6             | 91           | 664          | 304          | 215           |
| 2        | <6             | 91           | 664          | 256          | 664           |
| 3        | <6             | 91           | 128          | 181          | 431           |
| 4        | <6             | 91           | 152          | 152          | 256           |
| 5        | <6             | 91           | 215          | 304          | 431           |
| 6        | <6             | 91           | 181          | 304          | 362           |
| 7        | <6             | 91           | 256          |              |               |
