# Supplementary material
Source: PubMed Central journal article supplement (PMC10257374)
Supplement: 11427_2023_2378_MOESM6_ESM.pdf [file 11427_2023_2378_MOESM6_ESM.pdf]

# Figure S1

A

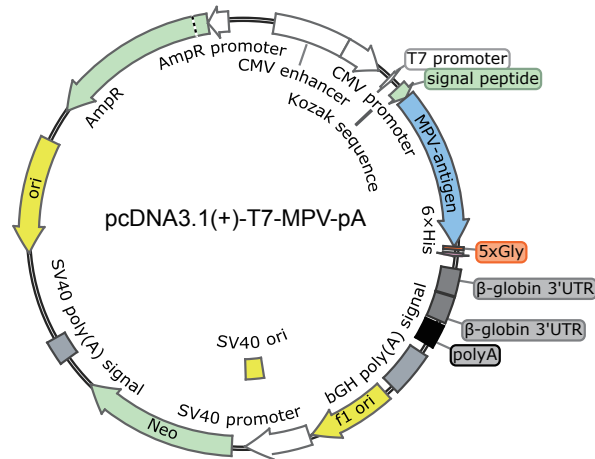

B

**A35R (181aa) :**

MMTPENDEEQTSVFSATVYGDKIQQGNKRKRVI GLCIRISMVISLLSMITMSAFLIVRLNQCMSANK  
AAITDSAVAVAAASSTHRKVVSSTTQYDHKESCNGLYYQGSCYILHSDYKSFEDAKANCAAESSTL  
PNKSDVLTWVLIDYVEDTWGSDGNPITKTTSDYQDSQSDVSQEVRYKFC

**B6R (317aa) :**

MKTISVVTLLCVLPVVYSTCTVPTMNNAKLTSTETSFNDKQKVTF TCDSGYHSLDPNAV CETDKW  
KYENPCKKMCTVSDYVSELYDKPLYEVNSTMTLSCNGETKYFRCEEKNGNTSWNDTVTCPNAEC  
QPLQLEHGSCQPVKEKYSFGEYMTINCDVGYEVIGVSYISCTANSWNVIPSCQQKCDIPSLNGLIS  
GSTFSIGGVIHLSCKSGFTLTGSPSSCIDGKWNPIPTCVR SNEEFDPVDDGPDETDL SKLSKDV  
VQYEQEI ESLEATYHIIIMALTIMGVIFLISIIVLVCSDKNNDQYKFHKL LP

**A29L (110aa) :**

MDGTLFPGDDDLAIPATEFFSTKAAKNPETKREAVKAYGDDNEETLKQRLTNLEKKITNITTKFEQI  
EKCKRNDEVLFRLENHAETLRAAMISLAKKIDVQTGRHPYE

**tPA sp-E8L<sub>IECD</sub> (306aa) :**

MDAMKRGLCCVLLLCGAVFVSPSQEI HARFRPQQLSPINIETKKAISDARLKTLDIHYNESKPTTIQ  
NTGKLVRI NFKGGYISGGFLPNEYVLSTIHIYWGKEDDYGSNHLIDVYKYSGEINLVHWNKKKYSSY  
EEAKKHDDGIIIIAIFLQVSDHKNVYFQKIVNQLDSIRSANMSAPFDSVFYLDNLLPSTLDYFTYLGTT  
INHSADA AWIIFPTPINIHSDQLSKFRTLSSSNHEGKPHYITENYRNPYKLNDDTQVYYSGEIIRAAT  
TSPVRENYFMKWLSDLREACFSYYQKYIEGNKT

**tPA sp-H3L<sub>IECD</sub> (291aa) :**

MDAMKRGLCCVLLLCGAVFVSAAAVKTPVIVVPVIDRPPSETFPNVHEHINDQKFDDVKDNEVMQ  
EKRDVVIVNDDPDHYKDYVFIQWTGGNIRDDDKYTHFFSGFCNTMCTEETKRNIARHLALWDSKF  
FTELENKNVEYVVIENDNVIEDITFLRPVLKAIHDKKIDILQMREIITGNKVKTELVIDKDHAIFTYTG  
YDVSL SAYIIRVTTALNIVDEI IKSGLSSGFYFEIARIENEMKINRQIMDNSAKYVEHDPRLVAEHRF  
ETMKPNFWSRIGTVA AKRYP

**tPA sp-L1R<sub>IECD</sub> (207aa) :**

MDAMKRGLCCVLLLCGAVFVSAMGAAASIQT VNTLSERISSKLEQEANASAQTKCDIEIGNFYIR  
QNHGCNITVKNMCSADADAQLDAVLSAATETYSGLTPEQKAYVPAMFTAALNIQTSVNTVVRDFE  
NYVKQTCNSSAVVDNKLKIQNVIIDECY GAPGSPTNLEFINTGSSKGNCAIKALMQLTTKATTQIAP  
RQVAGTGVQ

**Figure S1. Construction of expression vectors for MPV-antigens mRNA production.**

A. The structure map of pcDNA3.1(+) expression vectors for MPV antigen genes.

B. Amino acid sequence of MPV antigens used in this study. IECD: integral extracellular domain.
