# Supplementary material
Source: PubMed Central journal article supplement (PMC10257374)
Supplement: 11427_2023_2378_MOESM7_ESM.pdf [file 11427_2023_2378_MOESM7_ESM.pdf]

# Figure S2

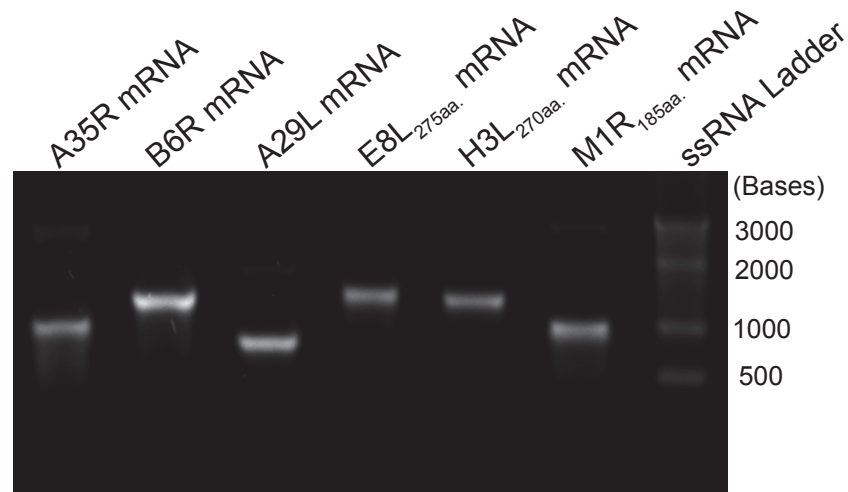

**Figure S2. Analysis of *in vitro* transcribed mRNA by electrophoresis.**

The mRNAs were produced *in vitro* using T7 RNA polymerase-mediated transcription from linearized DNA templates. The final mRNA product was purified and resuspended in RNase-free water. About 2  $\mu\text{g}$  of each mRNA and RNA ladder were denatured at 65  $^{\circ}\text{C}$  for 10 min, and cooled on ice for 2 min before analyzed by agarose gel electrophoresis.
