# Supplementary material
Source: PubMed Central journal article supplement (PMC10257374)
Supplement: 11427_2023_2378_MOESM8_ESM.pdf [file 11427_2023_2378_MOESM8_ESM.pdf]

# Figure S3

**A**

| The number of different cells type | Lymphocyte, LYMPH ( $\times 10^9 / L$ ) | Neutrophil, NEUT ( $\times 10^9 / L$ ) | Monocyte, MONO ( $\times 10^9 / L$ ) | Eosinophil, EO ( $\times 10^9 / L$ ) | Basophil, BASO ( $\times 10^9 / L$ ) |
|------------------------------------|-----------------------------------------|----------------------------------------|--------------------------------------|--------------------------------------|--------------------------------------|
| <b>Before Immunization</b>         | 7.24 $\pm$ 1.25                         | 0.89 $\pm$ 0.08                        | 0.17 $\pm$ 0.04                      | 0.15 $\pm$ 0.04                      | 0.01 $\pm$ 0.01                      |
| <b>After Immunization</b>          | 7.54 $\pm$ 1.08                         | 1.35 $\pm$ 0.19                        | 0.33 $\pm$ 0.03                      | 0.24 $\pm$ 0.06                      | 0.01 $\pm$ 0.00                      |

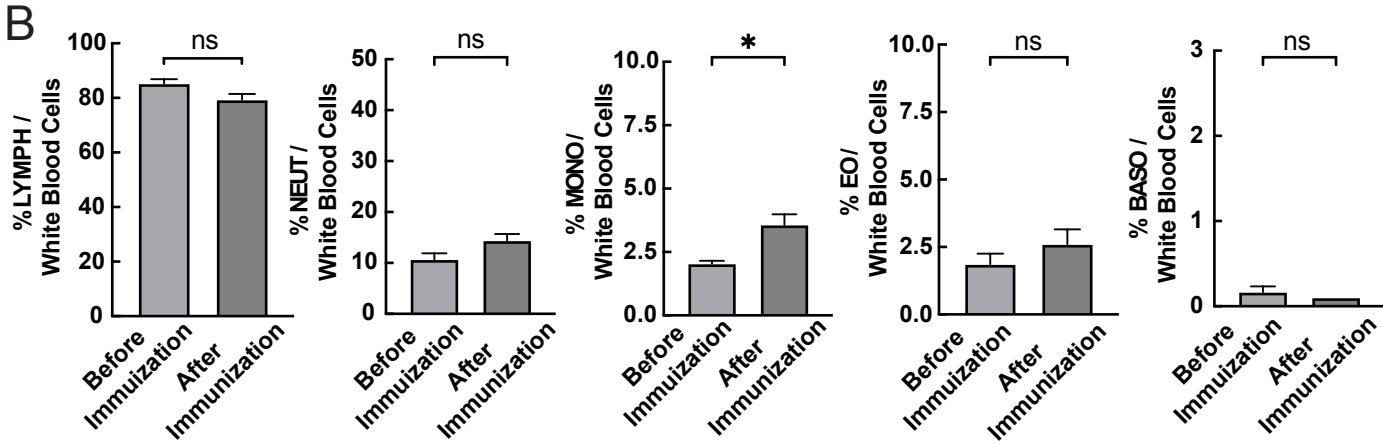

**Figure S3.** The number (A) and proportion (B) of lymphocytes, neutrophils, monocytes, and other myeloid cells within white blood cells (WBC) in mouse blood samples obtained one day before and six days after the immunization with MPV-EM6 (total 45  $\mu$ g mRNA, *Materials and methods*). Different cell populations were treated by lysercell WDF buffer (Sysmex, Japan) and detected using the XN-1000 automated hematology analyzer according to the manufacturer’s protocol (Sysmex, Japan). Data are shown as mean  $\pm$  SEM (n=3). Comparisons were performed by Student’s *t*-test (\**p* < 0.05, \*\**p* < 0.01, \*\*\**p* < 0.001, \*\*\*\**p* < 0.0001).
